# Supplementary material for: Robots and transformations of work in farm: a systematic review of the literature and a research agenda
Source: Springer Nature journal article supplement (doi:10.1007/s13593-022-00796-2), 2022-06-30
Supplement: MOESM1 [file 13593_2022_796_MOESM1_ESM.pdf]

# Robots and Transformations of Work in Farms -Protocol for a Systematic Review

Théo Martin, P. Gasselin, Nathalie Hostiou, Gilles Feron, L Laurens, F  
Purseigle

## ► To cite this version:

Théo Martin, P. Gasselin, Nathalie Hostiou, Gilles Feron, L Laurens, et al.. Robots and Transformations of Work in Farms -Protocol for a Systematic Review. 2020. hal-02615306

**HAL Id: hal-02615306**

**<https://hal.inrae.fr/hal-02615306>**

Preprint submitted on 25 May 2020

**HAL** is a multi-disciplinary open access archive for the deposit and dissemination of scientific research documents, whether they are published or not. The documents may come from teaching and research institutions in France or abroad, or from public or private research centers.

L'archive ouverte pluridisciplinaire **HAL**, est destinée au dépôt et à la diffusion de documents scientifiques de niveau recherche, publiés ou non, émanant des établissements d'enseignement et de recherche français ou étrangers, des laboratoires publics ou privés.

# Robots and Transformations of Work in Farms

## *Protocol for a Systematic Review*

T. Martin<sup>1</sup> , P. Gasselin<sup>1</sup> , N. Hostiou<sup>2</sup> , G. Feron<sup>3</sup> , L. Laurens<sup>4</sup>  & F. Purseigle<sup>5</sup>

---

## Abstract

In developed countries, the number of people working in agriculture keeps going down. Agricultural work is changing as wage-earning is increasing as well as part-time work and outsourcing. At the same time, robots are developed in many agricultural sectors (livestock, horticulture, field crops) and are part of the changes in work. This systematic review protocol details the method used to answer two questions related to robots and work in agriculture. First, we question what the transformations of work in agriculture are related to robots. Secondly, we will identify the explanatory factors of robotization in relation to work in farms. We have used a research query in order to find the different approaches and disciplines interested in work in agriculture. Two databases have been querying: Web of Science and Scopus. The data selection will include a screening stage using *Rayyan*<sup>®</sup>, a web app facilitating systematic reviewing. Eligibility criteria are detailed and a risk of bias analysis is designed. Finally, we detail the axes of analysis that will be used for the qualitative analysis.

## Introduction

Since its introduction in our language by science fiction and C.Kapek in 1920 (Capek 2011), the word *robot* has always been the object of hope or fear. On one hand, robotization is expected to enhance our lives, release from hard works and even represent a hope for a job liberation (Asimov 1950). On the other hand, robotization and automation threaten some jobs and even our social organization built around work (Rifkin 1995). But social sciences show that it is more about a displacement and a deep transformation than a replacement (Dujarier 2008, Autor 2015, Flichy 2017, Gaborieau 2017, Askenazy and Bach 2019, Casilli 2019).

Agriculture has long been concerned with robotization. Since the late 1990s in Western and Northern Europe, many dairy farms have introduced automated milking system. Furthermore, nowadays new stakeholders arrive in the agricultural sector such as start-ups and venture capitalists (Rotz, Duncan, *et al.* 2019). They are following – or encouraging - a movement of digital revolution in agriculture (Himesh *et al.* 2018) which represents a promising market. New agricultural sectors are concerned by robotics such as aquaculture, horticulture, vine-growing or field crops (Duckett *et al.* 2018). In developed countries, this robotization takes place in a context of transformation of agricultural work. Between 2007 and 2013, the agricultural employment in European Union dropped by 19% (Hostiou *et*

---

<sup>1</sup> Innovation, Univ Montpellier, CIRAD, INRAE, Institut Agro, Montpellier, France

<sup>2</sup> Université Clermont Auvergne, INRAE, AgroParisTech, VetAgro Sup, UMR Territoires, F- 63170 Aubière

<sup>3</sup> INRAE - Centre des Sciences du Goût et de l'Alimentation, AgroSup Dijon, CNRS, INRAE, UBFC, Dijon, France

<sup>4</sup> Université Paul Valéry-Montpellier, Innovation, Univ Montpellier, CIRAD, INRAE, Institut Agro, Montpellier, France

<sup>5</sup> Institut National Polytechnique de Toulouse, Ecole Nationale Supérieure Agronomique de Toulouse, UMR INP-INRA AGIR

*al.* 2020) related to a significant labour productivity gain. In France, while the historical family farming model is still the majority, there has been unprecedented growth in the number of salaried workers (Centre d'Études et de Prospective, 2019). Job insecurity and part-time, outsourcing, diversification, rising of suicide or differentiation by skill levels are all transformations of agricultural work in developed countries. These two phenomena - robotization and work transformations - raise questions about their possible interactions. But agriculture is rarely the subject of such analyses linking robotization and global transformations of work (Hostiou *et al.* 2017, Carolan 2019).

The diversity of disciplines and scientific communities (Malanski *et al.* 2019) interested in work in agriculture encourages a systematic review to describe the full range of work transformations related to robotics. This present review is also a means of questioning robotization across all relevant agricultural sectors and countries. The purpose of this systematic review is to answer two questions about the links between work and robotization in agriculture. First, we will question what the transformations of work in agriculture are related to robotics. Secondly, we will identify the explanatory factors of robotization in relation to work in farms.

Several methods can provide answers to these questions. We have chosen a systematic review of literature (SRL) considering that literature already provides a diversity of answers that can be synthesized by the systematic approach. According to Petticrew & Robert “*systematic reviews are literature reviews that adhere closely to a set of scientific methods that explicitly aim to limit systematic error (bias), mainly by attempting to identify, appraise and synthesize all relevant studies (of whatever design) in order to answer a particular question (or set of questions)*” (Petticrew and Roberts 2006). A SRL is an original approach in agricultural social sciences and none has ever been done on work in agriculture. This review is also a methodological contribution and proposition to shed light on certain research questions within our scientific community.

## Methods

### Concepts and framework

#### ✓ From key-concepts to the query

Figure 1: Translate a research question into keywords and thesaurus for query construction

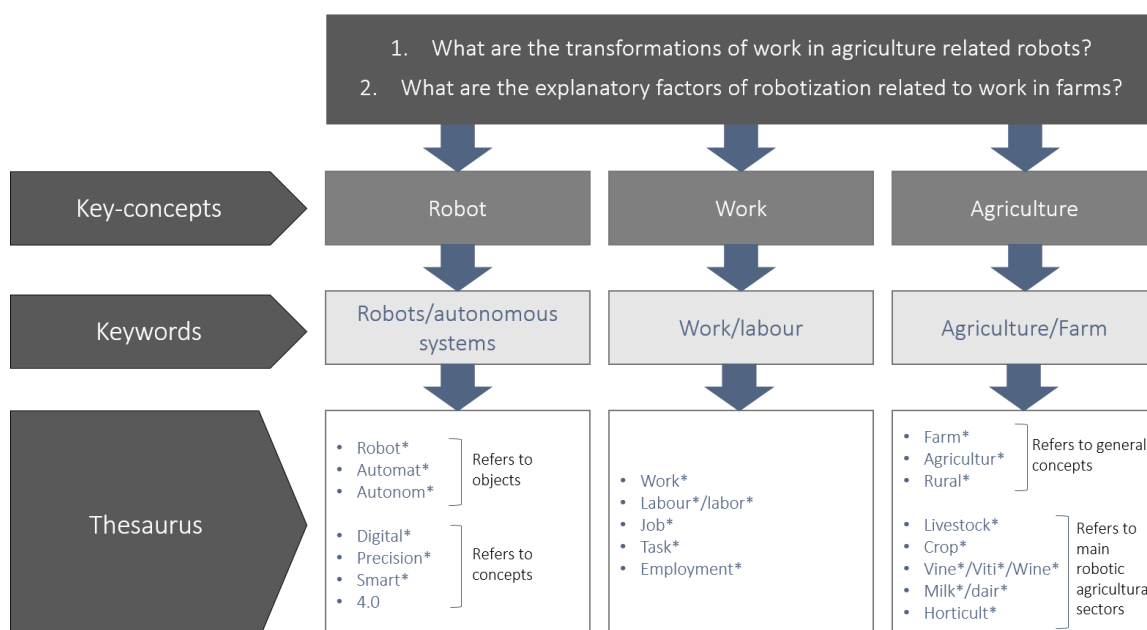

## ✓ Work in agriculture: framework and thesaurus

The main difficulty of our review question lies in the concept of "*work in agriculture*". In fact, "*work*" is a polysemic word and rich in a variety of ways of seeing. Each discipline, each current of thought has its own definition of work: e.g. sociology of work, ergonomics, economics, zootechnics, agronomy. This disciplinary diversity is accompanied by a diversity of analytical frameworks and approaches, what we call *dimensions of work*. All dimensions of work are concerned by robotization, thus the robot invites to consider work from a multidisciplinary perspective. Several hypotheses about work transformations related to farm robotization are the motive for a systematic review. We have classified these hypotheses into four dimensions: farm structure, technical-economic performances, work organization and meaning of work. These dimensions reflect both the disciplinary diversity of the work in agriculture and the systemic transformations that the robot produces.

- i. Different hypotheses are relating to **structural changes** on the farm and in the labour market. Robotization would encourage an increase in farm size (Rotz *et al.* 2003, Fleming *et al.* 2018), changes in social relation of production (e.g. use of off-farm work, wage labour development), changes in added value distribution, work segmentation and wage inequality as a result of high-skill/low-skilled bifurcated labour market (Kristal and Cohen 2017, Rotz, Gravely, *et al.* 2019).
- ii. Other hypotheses concern **technical-economic performances**. We assume that robotization is generally accompanied by an improvement in technical work performances: yield increase, physical labour productivity (yield/worker) and economic labour productivity increase (NVA<sup>6</sup>/worker). However, this is accompanied by an increase in production costs, a decrease in the economic productivity of the land (NVA/ha) and changes in agricultural products quality (e.g. milk quality in the case of AMS<sup>7</sup>).
- iii. The third sort of hypotheses concerns **work organization**. Our framework of work organization is composed of two dimensions: individual organization on-farm level and collective organization (on-farm and off-farm levels). On the one hand, at on-farm level, we assume that robotization changes task repartition between workers and time organization (farming system approach - N. Hostiou & Dedieu, 2012). We assume that robotization lead to a decrease in on-call work, the appearance of new tasks and the disappearance of some tasks, a new working time management. On the other hand, the collective dimension of work organization is also concerned. Our hypotheses are that robotization changes self-help groups and are created robot focus groups. We also suppose that the work collaboration of farmers changes. In particular, we assume the new role of advisers and new relations between farmers and advisers. Technicians of robotic companies could be new stakeholders into farm work.
- iv. Last, the **meaning of work** brings together different aspects of the subjective dimension of work (Fiorelli *et al.* 2010).
  - a. We assume that the robot allows a lower physical workload and arduousness. But it can also increase the mental workload by the permanence of the man-machine relationship via digital intrusion;
  - b. New individual identities (e.g. job representation) and feeling of community could go along with robotization. This may also encourage a blurring of the boundaries between professional and personal life (links between spaces and identities);

---

<sup>6</sup> Net Value Added

<sup>7</sup> Automated Milking System

- c. The relationship with animals and plants can be transformed by robotization (e.g. work relation with animals, plant representation from a living object to a data system);
- d. The construction of the rationality can be affected by the robotization with an increase of metric representations of reality and less resort to sensitive observations of living things.

These hypotheses depend both on the type of production and on the type of robot. The types of farms and forms of labour mobilization should also be determinant.

In elaborating the research query, we need to cover the disciplinary and conceptual diversity of work in agriculture while eliminating into results background noise as much as possible. First we have referenced all its thesaurus using AGROVOC (Caracciolo *et al.* 2013). Then we compared our thesaurus of "work" with other major reviews related to work in agriculture (Hostiou *et al.* 2017, 2020, Malanski *et al.* 2019). "Work" is the term most commonly used in scientific communities interested in work in agriculture (Hostiou *et al.*, 2020; Hostiou *et al.*, 2017; Malanski *et al.*, 2019). "Labor" or "labour" are mainly used in sociology and economy to look at work as a social relationship to each other but also as a performance (labour productivity). "Job" often refers to the notion of identity and status. The "Task" is mainly an ergonomic vision of work. Last, "Employment" generally refers to a macroeconomic vision of work. Obviously, the semantic boundaries are more complex. But we have tried to restore this semantic diversity in order to analyse the transformations of work in all its dimensions.

### ✓ Robot definition and thesaurus

Thinking a systematic definition of the robot is difficult since its conception evolves in time and space. *Robot* covers very different realities from the first robots in the beginning of the 20th seeking to copy animal behaviour to validate biological and psychological hypotheses (Meyer 2015) and today's the "social robots" that integrate the social rules and behaviours of humans (Belpaeme *et al.* 2018). The forms and uses of robots are also diversified as Erico Guizzo from the IEEE<sup>8</sup> points out: " « *There are robots the size of a coin and robots bigger than a car. Some robots can make pancakes. Others can land on Mars* » (Guillot 2018). As a result, the scientific community does not share a clear definition of a robot.

The most commonly used definition of a robot comes from the Robotic Industries Association (RIA) which defines the robot as "*a reprogrammable, multifunctional manipulator designed to move material, parts, tools, or specialized devices through various programmed functions for the performance of a variety of tasks*". Its definition is complex and debated because it refers to the different conceptions of work and autonomy. Moreover, this definition does not seem to be adapted to the agricultural context. There are at least four elements that make agriculture a special sector and justify a specific definition for agricultural robot. First, farm activities are deeply settled in ecosystems and farmers work with living beings as animals and plants. Secondly, agriculture involves a wide variety of tasks: e.g. animal care, tillage, equipment maintenance, accounting. Thirdly, agriculture is subject to great variability, both due to natural conditions (climate, pests) and the volatility of food prices. Finally, it is important to consider that 90% of farms around the world are family farms<sup>9</sup> (FAO<sup>10</sup>) with its particular work organizations, social relations and economic reasoning (Tchayanov 1990, Gasselin *et al.* 2014, Bosc *et al.* 2018). These specificities make agriculture a different sector especially from

---

<sup>8</sup> Institute of Electrical and Electronics Engineers

<sup>9</sup> 90% of farm are run by an individual or a family who rely primarily on family labour

<sup>10</sup> <http://www.fao.org/zhc/detail-events/fr/c/272677/>

industry - the first sector concerned by robotization – in which the division of labour, its organization and social relations are wholly singular.

Lowenberg-DeBoer et al. (2020) proposes a definition of a *field crop robot*: “a mobile, autonomous, decision-making, mechatronic device that accomplishes crop production tasks (e.g. soil preparation, seeding, transplanting, weeding, pest control and harvesting) under human supervision, but without direct human labour”. Here, the *mobile* character is essential and adapted to the dispersion of the field crop plots. But it is not compatible with livestock robots as automated milking system. Because this definition is limited to field crops, we propose here a definition of the agricultural robot adapted to the different farming sectors. For this definition, we refer to the different concepts mobilized in the different existing definitions (cf. Annexe 2):

- robot’s autonomy and no human intervention;
- decision-making : adaptation to the environment through data collection and analysis;
- multifunctional: performs different tasks;
- re-programmable via a man-machine interface;

The concepts of *robot’s autonomy* and a relative independence of human work are mobilized by Lowenberg-DeBoer et al. (2020) as usual into the different definitions of the robot (cf. Annexe 2). In agriculture, autonomy refers to the autonomy of farmers. This is why we prefer the concepts of *adaptation* to its environment. This adaptation is allowed by data collection (via sensors), data analysis (software) and tasks modulation (via actuators). This adaptation to the environment is what differentiates the robot from the automate (Guillot 2018). The agricultural robot environment differs from an industrial robot environment by a relationship to the living beings (animals and plants). The robot does not require direct human intervention. However, it is not independent of human labour, whether for its manufacture, its maintenance or for the new tasks it imposes (e.g. programming, data interpretation). So we prefer to specify that robot performs without *direct* human intervention.

The concept of *decision-making* is also often used for the robot’s definition. Because *decision* is an important concept for farm system and farmers’ choice analysis, using it for the *robot* is ambiguous. A farmer’s decision cannot be substituted by a robot especially because it enlists cognitive and affective dimensions (Carpentier-Roy 1992, Cerf and Sébillotte 1997, Dejourn and Gernet 2016). So we have decided to rule it out. *Multifunctionality* and *re-programmability* are also usually used into robot definitions.

After all, we propose a definition of the agricultural robot (AR) that will be used for the selection of publications and compatible with different agricultural sectors (vine-growing, livestock, field crop, horticulture). This definition of the AR includes three parts: i. what does it do? ii. what it is? iii. what does it produce?

**An agricultural robot is an re-programmable mechatronic<sup>11</sup> device that performs different farming tasks without direct human intervention and adapted to its environment through data collection and analysis.** The agricultural robot is characterized by interactions with the biological and physical environment (plants, soil, animals, etc.). It is composed of a hardware artefact made up of one or more sensors (data collection) and actuators (tasks making) and a software artefact that allows data analysis (task modulation). The agricultural robot produces tasks (actuators), data (sensors) and services (data analysis).

---

<sup>11</sup> Combination of electrical, mechanical and computer engineering

This definition is a first proposition for publication selection and will certainly evolve during the final analysis of the papers. It is a starting point for understanding what is and what is not a robot in agriculture.

For the query research, we used two types of robot thesaurus. The first type refers to object and their characteristics: “autonomous” and “automated”. The difference with “robot” is not explicit given the difficulties to define the robot. So, “autonomous systems” or “automated systems” are commonly used as a “robot” synonym. The second type of thesaurus refers to concepts. The robot can be included into broader concepts as precision agriculture, digital agriculture, smart farming or agriculture 4.0. Consequently, we considered these concepts in our query.

### ✓ Agriculture thesaurus

Work transformations after robotization can be studied on specific tasks and not on the whole farm organization. Below (Table 1), we have referenced the agricultural tasks that are subject to robotization. This list is not exhaustive given the diversity of robot definitions and the rapid development of the agricultural robotic sector. So using these tasks for the research query represents a risk of non-exhaustiveness. So we preferred to reference the main agricultural orientations concerned by robotization: livestock, dairy farming, field crops, horticulture and vine-growing. These terms are sometimes preferred to generic terms (farm, farming, agriculture).

Table 1. Agricultural tasks robotized at farm level

| CROPS FARMING<br>(Aravind <i>et al.</i> 2017)                                                         | LIVESTOCK<br>(Allain 2019)                               |
|-------------------------------------------------------------------------------------------------------|----------------------------------------------------------|
| Harvesting, picking<br>Tilling (soil works)<br>Crop scouting and control<br>Seeding and transplanting | Milking<br>Feeding<br>Cleaning<br>Treatment<br>Transport |

We choose not to include aquaculture, although it is sometimes associated with the agricultural sector. Indeed, work and robotics in aquaculture refer to very different technical, economic and social realities from those of agriculture.

✓ **PICO framework**

We use a PICO framework for the formulation of our systematic review question (Methley *et al.* 2014). We present the different component of the PICO search tool in the table below:

Table 2: Participants, Interventions, Comparators and Outcomes - PICO description

| PICO COMPONENTS                    |                                                                                                                                                                                                                                                                                                                                                                                                                                                                                                                                                                                                                                                                                                                                                                                                                                                                                                                                                                                                                                                                                                                                                                                                                                                                                                                                                                                                                                                                                                                                                                                                                                             |
|------------------------------------|---------------------------------------------------------------------------------------------------------------------------------------------------------------------------------------------------------------------------------------------------------------------------------------------------------------------------------------------------------------------------------------------------------------------------------------------------------------------------------------------------------------------------------------------------------------------------------------------------------------------------------------------------------------------------------------------------------------------------------------------------------------------------------------------------------------------------------------------------------------------------------------------------------------------------------------------------------------------------------------------------------------------------------------------------------------------------------------------------------------------------------------------------------------------------------------------------------------------------------------------------------------------------------------------------------------------------------------------------------------------------------------------------------------------------------------------------------------------------------------------------------------------------------------------------------------------------------------------------------------------------------------------|
| Participants ( <b>population</b> ) | Farm, farm system, farmers and farm workers in all agricultural sectors (e.g. field crops, livestock, horticulture, vine-growing)<br>(in consistency with our work analysis framework)                                                                                                                                                                                                                                                                                                                                                                                                                                                                                                                                                                                                                                                                                                                                                                                                                                                                                                                                                                                                                                                                                                                                                                                                                                                                                                                                                                                                                                                      |
| Interventions ( <b>exposures</b> ) | Adoption of robots for farming<br>(in consistency with our robot definition – page 5)                                                                                                                                                                                                                                                                                                                                                                                                                                                                                                                                                                                                                                                                                                                                                                                                                                                                                                                                                                                                                                                                                                                                                                                                                                                                                                                                                                                                                                                                                                                                                       |
| Comparators ( <b>control</b> )     | <ul style="list-style-type: none"> <li>• Farm <b>without</b> robots</li> <li>• Farm <b>before</b> robot adoption</li> </ul>                                                                                                                                                                                                                                                                                                                                                                                                                                                                                                                                                                                                                                                                                                                                                                                                                                                                                                                                                                                                                                                                                                                                                                                                                                                                                                                                                                                                                                                                                                                 |
| Outcomes                           | <ul style="list-style-type: none"> <li>• <b>Farm structure and labour market:</b> farm size, social relationship of production (e.g. family work, wage labour), added value distribution, any variable related to production factors organization and interaction (land, labour and capital) and labour market;</li> <li>• <b>Performances:</b> <ul style="list-style-type: none"> <li>i. <u>Technical</u> indicators (e.g. yield, efficiency, quality of milk, energy sobriety, input economy);</li> <li>ii. <u>Economic</u> indicators (e.g. productivity, incomes, surplus, job created);</li> </ul> </li> <li>• <b>Organization</b> at <u>individual</u> and <u>collective</u> levels: For both organization dimensions, we will pay particular attention to the autonomy of work and workers: <ul style="list-style-type: none"> <li>iii. <u>On-farm level:</u> any analysis related to the question: who do what and when?</li> <li>iv. <u>Off-farm level:</u> any analysis related to off-farm work as advisors, robot technicians and collective organizations (e.g. self-help groups, roles of robot technicians, new roles for farm advisors);</li> </ul> </li> <li>• <b>Meaning:</b> <ul style="list-style-type: none"> <li>i. Mental and physical <u>workload</u> (e.g. arduousness, digital intrusion)</li> <li>ii. Individual and collective <u>identities</u> (e.g. job representations, feeling of community)</li> <li>iii. Relation to the <u>living</u> (plants, animals, ecosystems)</li> <li>iv. Pleasure at work</li> <li>v. <u>Rationality</u> construction (e.g. metric, pragmatic, economic)</li> </ul> </li> </ul> |

**Research strategy**✓ **Information sources**

We use two databases: *Web of Science Core Collection* (WoS) and *Scopus*. Some articles identified during the query test phase can be added to the corpus after validation by at least two reviewers. Grey literature publications may be added if they are cited in peer-reviewed articles into the corpus and



thus recognized as useful by the scientific community (reports from collectives, research or consulting offices and written by scientists).

### ✓ The query

For this query, we will consider articles, books, book chapters and reviews. We exclude proceeding papers because they are part of a publication process but do not necessarily represent a finalized scientific work. There are no limits on disciplines, methods and countries. Indeed, the aim is also to show how the question of the transformation of work in robotic farms come up according to disciplines, periods and countries. We collect all this document published between 1955 and 2020. The 1990s correspond to the development of the first milking robots –automated milking system- on dairy farms. It is therefore from these years onwards that the number of publications increases. However, it will be pertinent to analyse how the robotization of work in agriculture issues has evolved over time. The robot question in agriculture has been asked earlier (Sistler 1987, Kawamura and Namikawa 1989). This SRL will enable to see whether older publications have addressed the issue. The search will only include articles in English.

After several tests to assess the relevance of the terms included into our query, we have retained the following equation. Below, we detail our query for the WoS database. We use the same query for Scopus - some differences are due to the syntax and Boolean operator's specificities.

Our three key concepts - robot, agriculture and work - are broad and imprecise concepts. A search associating these three concepts with AND in the field TOPICS gives too much background noise. That's why we have associated these terms two by two in the title and the remaining third in the TOPICS.

### ✓ WoS research

|               |                                                                                                                          |
|---------------|--------------------------------------------------------------------------------------------------------------------------|
| <u>Set 1:</u> | TI=(robot* OR automat* OR autonom* OR digital* OR precision* OR smart* OR 4.0)                                           |
| <u>Set 2:</u> | TS=(work* OR labor OR labour OR job* OR task* OR employment*)                                                            |
| <u>Set 3:</u> | TS=(farm* OR agricultur* OR livestock* OR crop* OR horticultur* OR vine* OR wine* OR viti* OR dair* OR milk* OR rural* ) |
| <u>Set 4:</u> | TI=(work* OR labor OR labour OR job* OR task* OR employment*)                                                            |
| <u>Set 5:</u> | TI=(farm* OR agricultur* OR livestock* OR crop* OR horticultur* OR vine* OR wine* OR viti* OR dair* OR milk* OR rural* ) |
| <u>Set 6:</u> | TS=(robot* OR automat* OR autonom* OR digital* OR precision* OR smart* OR 4.0)                                           |

| SUB-SETS/RESEARCH FIELDS | TITLE (TI) | TOPICS (TS) |
|--------------------------|------------|-------------|
| #1 AND #4 AND #3         | R AND W    | F           |
| #1 AND #5 AND #2         | R AND F    | W           |
| #4 AND #5 AND #6         | W AND F    | R           |

R: Robot; W: Work; F: Farm

#### Query used (sum of the 3 sub-set):

((#1 AND #4 AND #3) OR (#1 AND #5 AND #2) OR (#4 AND #5 AND #6))

*Language : English*

*Document types : Article OR Book OR Book Chapter OR Review*

*Custom year range : 1955 to 2020*

*Web of Science Core Collection : SCI-EXPANDED, SSCI, A&HCI, CPCI-S, CPCI-SSH, BKCI-S, BKCI-SSH, ESCI*

## ✓ Scopus research

```
((TITLE(robot* OR automat* OR autonom* OR digital* OR precision* OR smart* OR 4.0)) AND (TITLE(work* OR labor OR labour OR job* OR task* OR employment*))) AND (TITLE-ABS-KEY(farm* OR agricultur* OR livestock* OR crop* OR horticultur* OR vine* OR wine* OR viti* OR dair* OR milk* OR rural* )) OR ((TITLE(robot* OR automat* OR autonom* OR digital* OR precision* OR smart* OR 4.0)) AND (TITLE(farm* OR agricultur* OR livestock* OR crop* OR horticultur* OR vine* OR wine* OR viti* OR dair* OR milk* OR rural* )) AND (TITLE-ABS-KEY(work* OR labor OR labour OR job* OR task* OR employment*))) OR ((TITLE(work* OR labor OR labour OR job* OR task* OR employment*))) AND (TITLE(farm* OR agricultur* OR livestock* OR crop* OR horticultur* OR vine* OR wine* OR viti* OR dair* OR milk* OR rural* )) AND (TITLE-ABS-KEY(robot* OR automat* OR autonom* OR digital* OR precision* OR smart* OR 4.0))) AND ( LIMIT-TO ( PUBSTAGE,"final" ) ) AND ( LIMIT-TO ( DOCTYPE,"ar" ) OR LIMIT-TO ( DOCTYPE,"re" ) OR LIMIT-TO ( DOCTYPE,"ch" ) OR LIMIT-TO ( DOCTYPE,"bk" ) ) AND ( LIMIT-TO ( LANGUAGE,"English" ) )
```

## ✓ Selection process: the screening

Each stage of article selection involves at least two participants (2 for screening and 3 for eligibility). Any conflict between participants regarding this selection will be arbitrated during a meeting to discuss and decide.

EndNote® will be used to remove duplicates after article extraction from the two databases. For the first studies selection stage – the screening –, we will use Rayyan®, a free web app, *“that helps expedite the initial screening of abstracts and titles using a process of semi-automation”* (Ouzzani et al. 2016). Two reviewers - T. Martin and P. Gasselin - will carry out this screening without the possibility to see the choice of the other.

## ✓ Selection process: eligibility criteria

Then, an assessment of eligibility will be conducted. As well, three reviewers will be in charge of this assessment for eligibility: P. Gasselin, N.Hostiou and T. Martin (Annexe 2). This selection follows pre-established criteria:

- Language: English;
- The type of technology considered is well characterized: we will exclude publications that deal with broad concepts as precision farming, smart farming and agriculture 4.0 if the type of technology is not specified – our **intervention** concerns robots;
- Work in agriculture is considered at farm level: we will not consider work transformations in food process firms – our **population** PICO contains farm, farm system, farmers and farm workers;
- At least one of the dimensions of work in agriculture is addressed (PICO framework): farm structure, performances, organization and meaning;

## Data analysis

### ✓ Outcomes

Two different types of data will be extracted from articles. Qualitative data concerning work organization changes and meaning of work will be extracted. Some quantitative data will be considered related to work performances (e.g. labour productivity, yields per worker). But we will not carry out a meta-analysis and thus extract its data. We will limit our analysis to collecting the conclusions of quantitative analyses (e.g. increase or decrease in productivity, increase or decrease in working time). If the variability of the conclusions and the number of data allow it, a meta-analysis can be carried out afterwards. Thus, this review does not include quantitative analysis.

### ✓ Risk of bias

The risk of bias can compromise the proof of evidence related to work transformation. The risk of bias analysis does not constitute a review or an assessment. First of all, we consider that in science every methodological approach can be improved. Secondly, this bias analysis does not constitute an absolute evaluation but an assessment relative to our question and our choice of analytical framework. So there's no judgement on the methodological choices made. The risk of bias depends on four criteria:

- No sample description (characterization of the farm diversity considered)
- No robot description: the robot considered must be identified (brand and model) or described in detail to be able to assess his compatibility with our robot definition.
- No worker characterization: who are we talking about? (e.g. a farmer, a family member, a seasonal worker, an outsource worker); What type of work, tasks? (e.g. milking, herd observation, harvesting)
- Comparison robustness: more generally, the main risk of bias is to attribute work change that does not come from the robots but from structural changes on the farm or from the farm's socio-economic and regulatory context.

We classify the risk of bias at three levels – *high*, *moderate* and *some concerns* - according to the aggregation of pre-established criteria. The aggregation method, i.e. the weight of each criterion will be detailed later according to the types of studies included in qualitative analysis. We use this table for each publication in order to assess the risk of bias.

Table 3: Risk of bias assessment

| Study | Sample description | Robot description | Worker characterization – Who ? | Worker characterization – What ? | Comparison robustness | Risk of bias                                                                                          |
|-------|--------------------|-------------------|---------------------------------|----------------------------------|-----------------------|-------------------------------------------------------------------------------------------------------|
| 1     | Y/PY/PN/N/NI       | Y/PY/PN/N/NI      | Y/PY/PN/N/NI                    | Y/PY/PN/N/NI                     | Y/PY/PN/N/NI          | <ul style="list-style-type: none"> <li>• High</li> <li>• Moderate</li> <li>• Some concerns</li> </ul> |

Y: Yes, PY: Probably Yes, PN: Probably No, N: No, NI: No Indication

### ✓ Qualitative analysis

Our work analysis framework consists of three axes. The first corresponds to the performances of the work. No data extraction is foreseen but an analysis of the conclusion with regard to the other axes of analysis. The second axis is work organization. Here we consider the individual organization of work through the temporal arrangement of the different tasks of a worker. The notions of autonomy and constraints are central to our analysis. We will also consider the collective organization of work both on and off the farm (e.g. for France: CUMA, self-help groups). Thirdly, we will analyse work through its meaning, i.e. all the perceptions, values and other things that discourses can provide.

The work transformation analysis method is based on a comparative approach. First of all, this comparison will be made between robotized and non-robotized farms or before and after robot adoption. Then, we will compare:

- The different types of farms (e.g. size, type of work, crop and livestock diversity)
- The different productive sectors (e.g. dairy, field crops, horticulture)
- The different countries studied

## Bibliographic context

### ✓ Preliminary research

In order to verify the relevance of our systematic review project with regard to the state of the art, we carried out a search on Web Of Science (WoS). The goal is to check that no review has been performed on our research question. Initial research confirmed that there is no review concerning work and robot in agriculture. The query used for this preliminary research is the following:

#### Web of Science Research

TI=((work\* OR labor OR labour OR job\* OR task\* OR employment\* ) AND ( robot\* OR automat\* OR autonom\* OR digital\* OR precision\* OR smart\*) AND (farm\* OR agricultur\* OR livestock\* OR crop\* OR horticultur\* OR harvest\* OR milk\* OR pick\* OR rural OR feed\* ) **AND review**)

Indexes=SCI-EXPANDED, SSCI, A&HCI, CPCI-S, CPCI-SSH, BKCI-S, BKCI-SSH, ESCI Timespan=1955-2020

Table 4: Review related to the work in agriculture - WoS research on 04/04/2020

| TITLE                                                                                                                                                                                               | YEAR | AUTHORS                                                                                                                          | JOURNAL                                           |
|-----------------------------------------------------------------------------------------------------------------------------------------------------------------------------------------------------|------|----------------------------------------------------------------------------------------------------------------------------------|---------------------------------------------------|
| <b>Precision farming for increased land and labour productivity in semi-arid West Africa. A review</b><br><a href="https://doi.org/10.1007/s13593-017-0424-z">doi: 10.1007/s13593-017-0424-z</a>    | 2017 | Aune, Jens B.; Coulibaly, Adama; Giller, Ken E.                                                                                  | Agronomy for Sustainable Development              |
| <b>Task-based agricultural mobile robots in arable farming: A review</b><br><a href="https://doi.org/10.5424/sjar/2017151-9573">doi:10.5424/sjar/2017151-9573</a>                                   | 2017 | Aravind, Krishnaswamy R.; Raja, Purushothaman; Perez-Ruiz, Manuel                                                                | Spanish Journal of Agricultural Research          |
| <b>Impact of precision livestock farming on work and human-animal interactions on dairy farms. A review</b><br><a href="https://doi.org/10.25518/1780-4507.13706">doi: 10.25518/1780-4507.13706</a> | 2017 | Hostiou, Nathalie; Fagon, Jocelyn; Chauvat, Sophie ; Turlot, Amélie ; Kling-Eveillard, Florence; Boivin, Xavier; Allain, Clément | Biotechnologie Agronomie Société et Environnement |

This research gives three results. None of these three reviews are systematic. This first review (Aune *et al.* 2017) looks at the effects of the types of seed used and the fertilization applied on yields. Moreover, it is specific to West Africa. This review illustrates the plasticity of certain concepts such as precision agriculture. Here the precision agriculture practises are seed types, mineral fertilization and manure (Aune *et al.* 2017). In other cases, precision agriculture is defined as “a whole-farm management approach using information technology, satellite positioning data, remote sensing, and data gathering” (Koutsos and Menexes 2017). The second review (Aravind *et al.* 2017) is limited to crop farming and does not include livestock. It is an overview of robots in open arable farming and robots are categorized by the type of operation (e.g. tilling, harvesting, crop scouting and control, seeding). There is no work transformation

analysis. The third review is the closest to our research question. It focuses on the transformations of work in precision livestock with special attention to robots (milking and feeding). It provides a relevant example of work transformations analysis. However, it is limited to animal production and is not systematic.

This research confirms the absence of systematic review related to robotics systems and work transformations in agriculture. It also indicates the presence of a scientific community interested in the work transformations and technologies in livestock (Hostiou *et al.* 2017, Dedieu 2019, Malanski *et al.* 2019, Servière *et al.* 2019).

### ✓ Corpus of publications used for query testing

The following table includes essential articles with regards to work in agriculture. All these publications will have to be in the final list of publications. We use this list as a test list for query assessment. This test list has been produced through an alert system for new publications and a non-systematic review related to robots and work in agriculture.

Table 5: Publications corpus for the query test

| TITLE                                                                                                                                                                                                                   | YEAR | AUTHORS                                                                                           | JOURNAL                                                    |
|-------------------------------------------------------------------------------------------------------------------------------------------------------------------------------------------------------------------------|------|---------------------------------------------------------------------------------------------------|------------------------------------------------------------|
| <b>Automated agrifood futures: robotics, labor and the distributive politics of digital agriculture</b><br><a href="https://doi.org/10.1080/03066150.2019.1584189">https://doi.org/10.1080/03066150.2019.1584189</a>    | 2019 | Carolan, Michael                                                                                  | The Journal of Peasant Studies                             |
| <b>Automatic herding reduces labour and increases milking frequency in robotic milking</b><br><a href="http://dx.doi.org/10.1016/j.biosystemseng.2016.12.010">http://dx.doi.org/10.1016/j.biosystemseng.2016.12.010</a> | 2017 | Drach, Uri and Halachmi, Ilan and Pnini, Tal and Izhaki, Ido and Degani, Amir                     | Biosystems Engineering                                     |
| <b>Automatic Milking Systems, Farm Size, and Milk Production</b><br><a href="https://doi.org/10.3168/jds.S0022-0302(03)74032-6">https://doi.org/10.3168/jds.S0022-0302(03)74032-6</a>                                   | 2003 | Rotz, C.A. and Coiner, C.U. and Soder, K.J.                                                       | Journal of Dairy Science                                   |
| <b>Comparing technical efficiency of farms with an automatic milking system and a conventional milking system</b><br><a href="https://doi.org/10.3168/jds.2012-5482">https://doi.org/10.3168/jds.2012-5482</a>          | 2012 | Steenefeld, W. and Tauer, L.W. and Hogeveen, H. and Oude Lansink, A.G.J.M.                        | Journal of Dairy Science                                   |
| <b>Designing Automated Milking Dairy Facilities to Maximize Labor Efficiency</b><br><a href="https://doi.org/10.1016/j.cvfa.2018.10.010">https://doi.org/10.1016/j.cvfa.2018.10.010</a>                                 | 2019 | Pitkäranta, Jouni and Kurkela, Virpi and Huotari, Virpi and Posio, Marjo and Halbach, Courtney E. | Veterinary Clinics of North America - Food Animal Practice |
| <b>Diversity in agricultural technology adoption: How are automatic milking systems used and to what end?</b><br><a href="https://doi.org/10.1007/s10460-014-9542-2">https://doi.org/10.1007/s10460-014-9542-2</a>      | 2015 | Schewe, Rebecca L. and Stuart, Diana                                                              | Agriculture and Human Values                               |

|                                                                                                                                                                                                                                                                    |      |                                                                                                                                                  |                                                     |
|--------------------------------------------------------------------------------------------------------------------------------------------------------------------------------------------------------------------------------------------------------------------|------|--------------------------------------------------------------------------------------------------------------------------------------------------|-----------------------------------------------------|
| <b>Economics of robots and automation in field crop production</b><br><a href="https://doi.org/10.1007/s11119-019-09667-5">https://doi.org/10.1007/s11119-019-09667-5</a>                                                                                          | 2019 | Lowenberg-DeBoer, James and Huang, Iona Yuelu and Grigoriadis, Vasileios and Blackmore, Simon                                                    | Precision Agriculture                               |
| <b>Impact of automatic milking systems on dairy cattle producers' reports of milking labour management, milk production and milk quality</b><br><a href="https://doi.org/10.1017/S1751731118000654">https://doi.org/10.1017/S1751731118000654</a>                  | 2018 | Tse, C. and Barkema, H. W. and DeVries, T. J. and Rushen, J. and Pajor, E. A.                                                                    | Animal                                              |
| <b>Impact of precision livestock farming on work and human-animal interactions on dairy farms. A review</b><br><a href="https://doi.org/10.25518/1780-4507.13706">https://doi.org/10.25518/1780-4507.13706</a>                                                     | 2017 | Hostiou, Nathalie and Fagon, Jocelyn and Chauvat, Sophie and Turlot, Amélie and Kling-Eveillard, Florence and Boivin, Xavier and Allain, Clément | Biotechnology, Agronomy and Society and Environment |
| <b>Innovation, practical benefits and prospects for the future development of automatic milking systems</b><br><a href="https://doi.org/10.15302/J-FASE-2016117">https://doi.org/10.15302/J-FASE-2016117</a>                                                       | 2017 | Jiang, Hongzhe and Wang, Wei and Li, Chunyang and Wang, Wei                                                                                      | Frontiers of Agricultural Science and Engineering   |
| <b>Invited review: The impact of automatic milking systems on dairy cow management, behaviour, health, and welfare</b><br><a href="https://doi.org/10.3168/jds.2011-4943">https://doi.org/10.3168/jds.2011-4943</a>                                                | 2012 | Jacobs, J. A. and Siegford, J. M.                                                                                                                | Journal of Dairy Science                            |
| <b>Robot innovation brings to agriculture efficiency, safety, labor savings and accuracy by plowing, milking, harvesting, crop tending/picking and monitoring</b><br><a href="https://doi.org/10.1108/IR-08-2014-0382">https://doi.org/10.1108/IR-08-2014-0382</a> | 2014 | Bloss, Richard                                                                                                                                   | Industrial Robot                                    |
| <b>Robotic milking: Technology, farm design, and effects on work flow</b><br><a href="https://doi.org/10.3168/jds.2016-11715">https://doi.org/10.3168/jds.2016-11715</a>                                                                                           | 2017 | Rodenburg, Jack                                                                                                                                  | Journal of Dairy Science                            |
| <b>Robotics and labour in agriculture. A context consideration</b><br><a href="https://doi.org/10.1016/j.biosystemseng.2019.06.013">https://doi.org/10.1016/j.biosystemseng.2019.06.013</a>                                                                        | 2019 | Marinoudi, Vasso and Štřenens, Claus G. and Pearson, Simon and Bochtis, Dionysis                                                                 | Biosystems Engineering                              |

# Administrative information

## Authors

Table 6: SRL participants

| AUTHORS                   | MAIL                                                                                                   | POSITION    | INSTITUTIONAL AFFILIATION                             |
|---------------------------|--------------------------------------------------------------------------------------------------------|-------------|-------------------------------------------------------|
| <b>Théo MARTIN</b>        | <a href="mailto:theo.martin@inrae.fr">theo.martin@inrae.fr</a><br>(corresponding author and guarantor) | PhD Student | UMR Innovation – INRAE - Montpellier                  |
| <b>Pierre GASSELIN</b>    | <a href="mailto:pierre.gasselin@inrae.fr">pierre.gasselin@inrae.fr</a>                                 | Researcher  | UMR Innovation – INRAE - Montpellier                  |
| <b>Nathalie HOSTIOU</b>   | <a href="mailto:nathalie.hostiou@inrae.fr">nathalie.hostiou@inrae.fr</a>                               | Researcher  | UMR Territoires – INRAE - Lempdes                     |
| <b>Gilles FERON</b>       | <a href="mailto:gilles.feron@inrae.fr">gilles.feron@inrae.fr</a>                                       | Researcher  | CSGA – INRAE - Dijon                                  |
| <b>Lucette LAURENS</b>    | <a href="mailto:lucette.laurens@supagro.fr">lucette.laurens@supagro.fr</a>                             | Professor   | UMR Innovation – Paul Valéry University - Montpellier |
| <b>François PURSEIGLE</b> | <a href="mailto:francois.purseigle@sciencespo.fr">francois.purseigle@sciencespo.fr</a>                 | Professor   | UMR Agir – ENSAT INP - Toulouse                       |

## Support

This SRL is part of the PhD thesis of Théo Martin. This work was supported by the French National Research Agency under the Investments for the Future Program, referred as ANR-16-CONV-0004. The PhD thesis is also funded by the INRAE meta-program GloFoodS. So all the funds used for this SRL comes from the French public sector.

## Authors contributions

This SRL is part of a PhD study led by Théo Martin (UMR Innovation – INRAE). He leads this review and therefore participates in all stages. Pierre Gasselin, co-director of the thesis participates in the review of the protocol, the selection of papers (screening and eligibility), the analysis and writing stages. Nathalie Hostiou, participates in the protocol review, paper selection by eligibility criteria, qualitative analysis and writing stages. Lucette Laurens, co-director and François Purseigle, supervisor of the thesis, contribute to the qualitative analysis phase and the paper review. Gilles Feron has contributed to the formulation of this protocol as part of its expertise in systematic review. The Annexe 2 details the contributions of each.

## Annexes

### Annexe 1: Authors contributions based on PRISMA diagram (Moher *et al.* 2010)

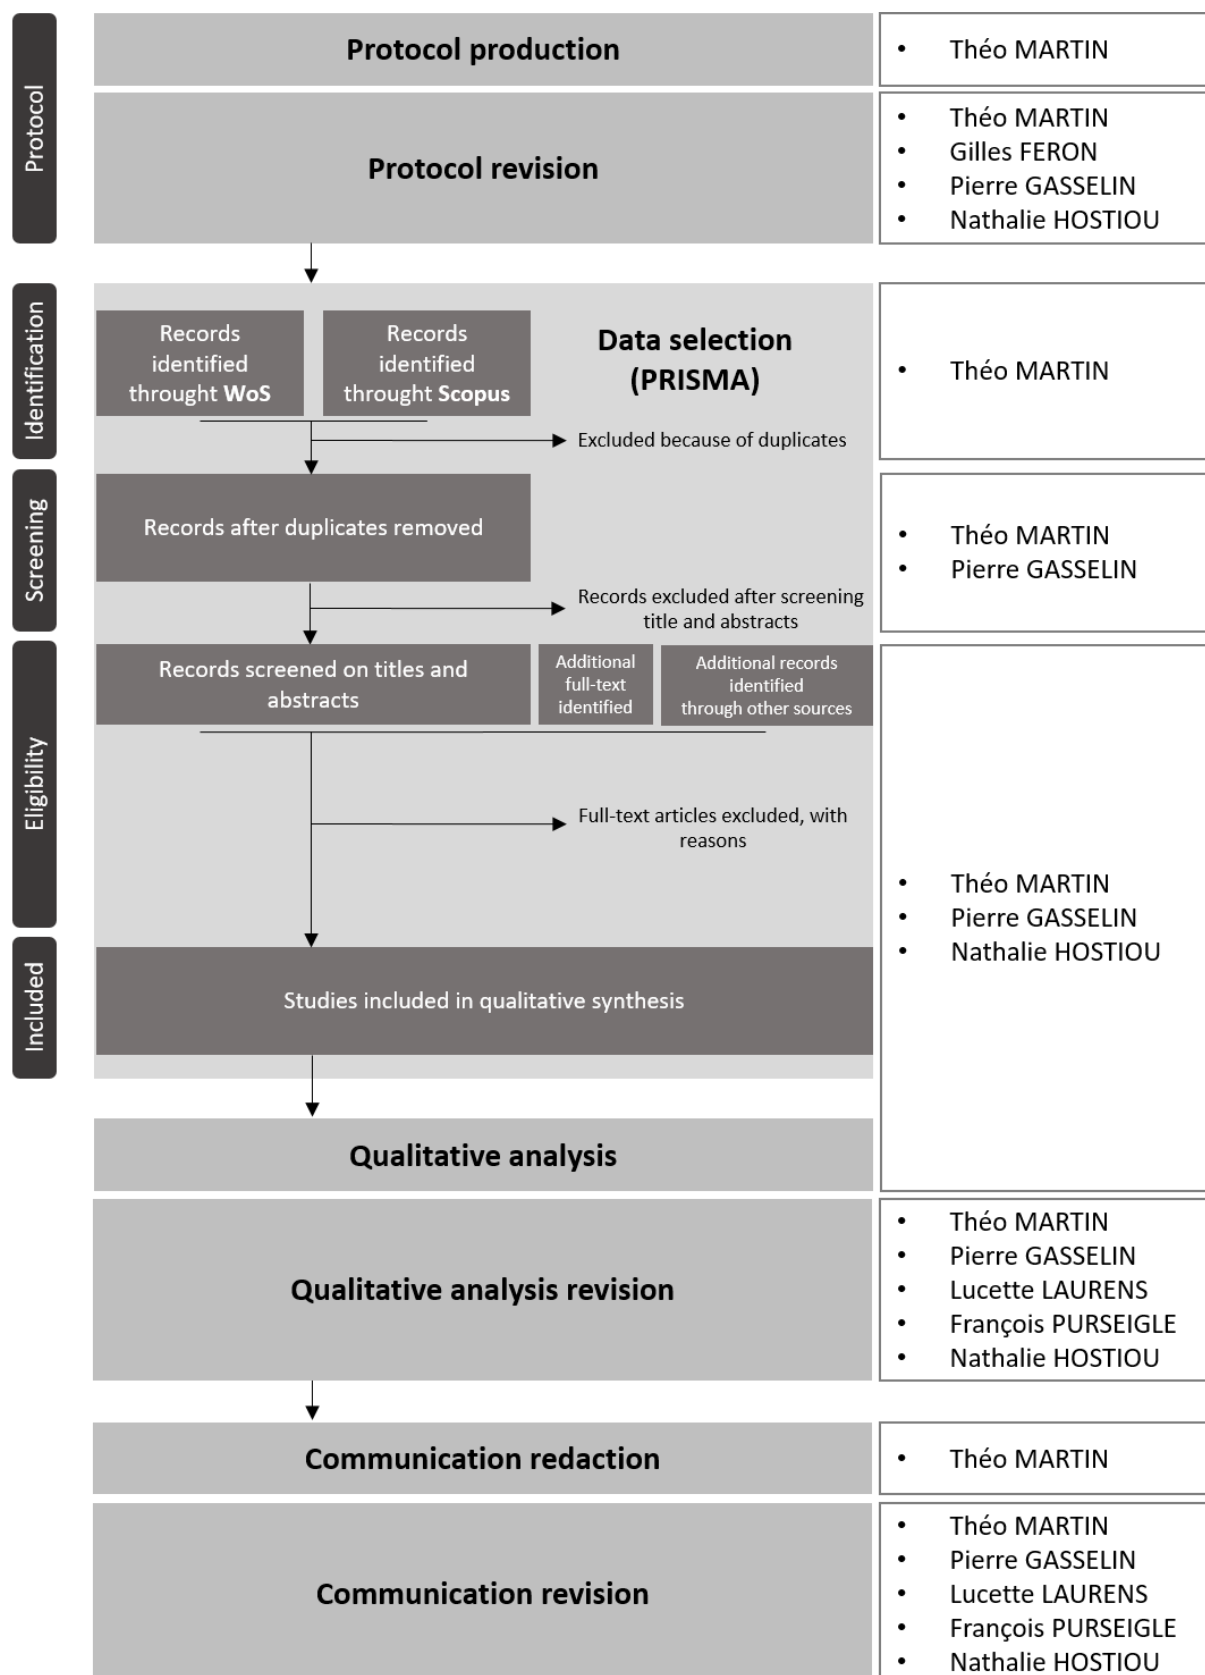



## Annexe 2: examples of robot definition

| SOURCE                                                                                        | REFERENCE                                                                                                                       | TYPE OF INSTITUTION                                     | YEAR | ROBOT DEFINITION PROPOSED                                                                                                                                                                                                                                                                            | KEY-CONCEPTS                                                                                                                                   |
|-----------------------------------------------------------------------------------------------|---------------------------------------------------------------------------------------------------------------------------------|---------------------------------------------------------|------|------------------------------------------------------------------------------------------------------------------------------------------------------------------------------------------------------------------------------------------------------------------------------------------------------|------------------------------------------------------------------------------------------------------------------------------------------------|
| Robotic Industries Association (RIA)                                                          | (Reddy <i>et al.</i> 2016)                                                                                                      | Trade association (US)                                  | 1979 | "A <b>robot</b> is a reprogrammable, multifunctional manipulator designed to move material, parts, tools or specialized devices through variable programmed motions for the performance of a variety of tasks."                                                                                      | <ul style="list-style-type: none"> <li>• Reprogrammable</li> <li>• Multifunctional</li> </ul>                                                  |
| Erico Guizzo, Institute of Electrical and Electronics Engineers (IEEE)                        | (Guizzo 2019)                                                                                                                   | Science                                                 | 2019 | « A <b>robot</b> is an autonomous machine capable of sensing its environment, carrying out computations to make decisions, and performing actions in the real world »                                                                                                                                | <ul style="list-style-type: none"> <li>• Autonomous</li> <li>• Decision-making</li> </ul>                                                      |
| International Journal of Mechanical & Mechatronics Engineering                                | (Yaghoubi <i>et al.</i> 2013)                                                                                                   | Science                                                 | 2013 | « A <b>robot</b> is a machine that can be programmed and reprogrammed to do certain tasks and usually consists of a manipulator such as a claw, hand, or tool attached to a mobile body or a stationary platform. »                                                                                  | <ul style="list-style-type: none"> <li>• Reprogrammable</li> </ul>                                                                             |
| British Robot Association                                                                     | (Ahmad Nayik 2015)                                                                                                              | Trade association (UK)                                  | n.d  | "An <b>industrial robot</b> is a reprogrammable device designed both to manipulate and/or transport parts, tools, or specified manufacturing implements through variable programmed motions for the performance of specific manufacturing tasks."                                                    | <ul style="list-style-type: none"> <li>• Reprogrammable</li> </ul>                                                                             |
| International Standards Organization (ISO)                                                    | (Ahmad Nayik 2015)                                                                                                              | International organization                              | n.d  | <b>Robot</b> as "An automatically controlled, re-programmable, multi-purpose, manipulative machine with several degrees of freedom, which may be either fixed in place or mobile for use in industrial automation applications."                                                                     | <ul style="list-style-type: none"> <li>• Reprogrammable</li> <li>• Multifunctional</li> <li>• Several degrees of freedom (Autonomy)</li> </ul> |
| (Lowenberg-DeBoer <i>et al.</i> 2020)                                                         | (Lowenberg-DeBoer <i>et al.</i> 2020)                                                                                           | Science                                                 | 2020 | <b>Field crop robot</b> as "a mobile, autonomous, decision-making, mechatronic device that accomplishes crop production tasks (e.g. soil preparation, seeding, transplanting, weeding, pest control and harvesting) under human supervision, but without direct human labour"                        | <ul style="list-style-type: none"> <li>• Mobile</li> <li>• Autonomous</li> <li>• Decision-making</li> <li>• No direct human labour</li> </ul>  |
| LEO ROBOTICS : Center for service robotics                                                    | <a href="http://www.leorobotics.nl/definition-robots-and-robotics">http://www.leorobotics.nl/definition-robots-and-robotics</a> | Collaboration of regional corporations and universities | n.d  | "A <b>robot</b> is an actuated mechanism programmable in two or more axes with a degree of autonomy, moving within its environment, to perform intended tasks. Autonomy in this context means the ability to perform intended tasks based on current state and sensing, without human intervention." | <ul style="list-style-type: none"> <li>• Programmable</li> <li>• Autonomy</li> <li>• No human intervention</li> </ul>                          |
| "Le temps des robots est-il venu ? : Découvrez comment ils transforment déjà notre quotidien" | (Braly and Gasnascia 2017)                                                                                                      | Science                                                 | 2017 | "un <b>robot</b> est lui capable de collecter des informations sur son environnement, de les analyser et d'adapter ses actions en conséquence, de manière autonome sans intervention humaine."                                                                                                       | <ul style="list-style-type: none"> <li>• Autonomous</li> <li>• No human intervention</li> </ul>                                                |

## References

- Ahmad Nayik, G. (2015). Robotics and Food Technology: A Mini Review. *Journal of Nutrition & Food Sciences*, 05(04). doi: [10.4172/2155-9600.1000384](https://doi.org/10.4172/2155-9600.1000384)
- Allain, C. (2019). Robotique en élevage : état des lieux et perspectives (IDELE). *Académie d'Agriculture de France*. Retrieved from <https://www.academie-agriculture.fr/actualites/academie/seance/academie/robotisation-en-elevage-etat-des-lieux-et-evolution?160119>
- Aravind, K. R., Raja, P., & Pérez-Ruiz, M. (2017). Task-based agricultural mobile robots in arable farming: A review. *Spanish Journal of Agricultural Research*, 15(1), 1–16. doi: [10.5424/sjar/2017151-9573](https://doi.org/10.5424/sjar/2017151-9573)
- Asimov, I. (1950). Runaround. In Gnome Press (Ed.), *Les Robots*.
- Askenazy, P., & Bach, F. (2019). AI and employment: An artificial threat. *Pouvoirs*, 170(3), 33–41. doi: [10.3917/pouv.170.0033](https://doi.org/10.3917/pouv.170.0033)
- Aune, J. B., Coulibaly, A., & Giller, K. E. (2017). Precision farming for increased land and labour productivity in semi-arid West Africa. A review. *Agronomy for Sustainable Development*, 37(3). doi: [10.1007/s13593-017-0424-z](https://doi.org/10.1007/s13593-017-0424-z)
- Autor, D. H. (2015). Why are there still jobs? *Journal of Economic Perspectives—Volume*, 29(3), 3–30. doi: [10.1257/jep.29.3.3](https://doi.org/10.1257/jep.29.3.3)
- Bosc, P.-M., Sourisseau, J.-M., Bonnal, P., Gasselin, P., Valette, E., & Bélières, J. (2018). *Diversity of Family Farming Around the World*. doi: [10.1007/978-94-024-1617-6](https://doi.org/10.1007/978-94-024-1617-6)
- Braly, J.-P., & Gasnascia, J.-G. (2017). *Le temps des robots est-il venu ?* Quae.
- Capek, K. (2011). *RUR : Rossum's Universal Robots* (Edition de la Différence, ed.).
- Caracciolo, C., Stellato, A., Morshed, A., Johannsen, G., Rajbhandari, S., Jaques, Y., & Keizer, J. (2013). The AGROVOC linked dataset. *Semantic Web*, 4(3), 341–348. doi: [10.3233/SW-2012-0087](https://doi.org/10.3233/SW-2012-0087)
- Carolan, M. (2019). Automated agrifood futures: robotics, labor and the distributive politics of digital agriculture. *The Journal of Peasant Studies*, 1–24. doi: [10.1080/03066150.2019.1584189](https://doi.org/10.1080/03066150.2019.1584189)
- Carpentier-Roy, M.-C. (1992). L'affectif : dimension occultée des rapports de travail. *International Review of Community Development*, 27, 153–159. <https://doi.org/10.7202/1033862ar>
- Casilli, A. A. (2019). *En attendant les robots*. Seuil.
- Centre d'Etudes et de Prospective. (2019). *Agri'Actif - Transformations des emplois et des activités en agriculture* (La documentation Française, ed.). La Documentation française.
- Cerf, M., & Sébillotte, M. (1997). Approche cognitive des décisions de production dans l'exploitation agricole. *Économie Rurale*, 239(1), 11–18. doi: [10.3406/ecoru.1997.4862](https://doi.org/10.3406/ecoru.1997.4862)
- Dedieu, B. (2019). Transversal views on work in agriculture. *Cahiers Agricultures*, 28, 8. doi: [10.1051/cagri/2019008](https://doi.org/10.1051/cagri/2019008)
- Dejours, C., & Gernet, I. (2016). *Psychopathologie du travail*. Elsevier Masson.
- Duckett, T., Pearson, S., Blackmore, S., Grieve, B., Chen, W.-H., Cielniak, G., ... Yang, G.-Z. (2018). *Agricultural Robotics: The Future of Robotic Agriculture*. Retrieved from <https://arxiv.org/abs/1806.06762>
- Dujarier, M.-A. (2008). *Le travail du consommateur : de McDo à eBay, comment nous coproduisons ce que nous achetons*. La Découverte.
- Fiorelli, C., Porcher, J., & Dedieu, B. (2010). *Improving farm working conditions: a proposal to characterise the individual relationship to work. A case study based on French multi-job-holder sheep farmers*. (July), 1117–1128.
- Fleming, A., Jakku, E., Lim-Camacho, L., Taylor, B., & Thorburn, P. (2018). Is big data for big farming or for everyone? Perceptions in the Australian grains industry. *Agronomy for Sustainable Development*, 38(3). doi: [10.1007/s13593-018-0501-y](https://doi.org/10.1007/s13593-018-0501-y)
- Flichy, P. (2017). *Les nouvelles frontières du travail à l'ère du numérique*. Seuil.
- Gaborieau, D. (2017). Quand l'ouvrier devient robot. *L'Homme et La Société*, 205(3), 245–268. doi: [10.3917/lhs.205.0245](https://doi.org/10.3917/lhs.205.0245)

- Gasselien, P., Choisis, J.-P., Petit, S., Purseigle, F., & Zasser, S. (2014). *L'agriculture en famille : travailler, réinventer, transmettre* (EDP Scienc). Retrieved from
- Guillot, A. (2018). Histoire de la robotique : des automates aux premiers robots. Retrieved November 21, 2019, from Dossier - La robotique de A à Z website: <https://www.futura-sciences.com/tech/dossiers/robotique-robotique-a-z-178/page/2/>
- Guizzo, E. (n.d.). What Is a Robot ? Retrieved November 21, 2019, from <https://robots.ieee.org/learn/>
- Himesh, S., Prakasa Rao, E. V. S., Gouda, K. C., Ramesh, K. V., Rakesh, V., Mohapatra, G. N., ... Ajilesh, P. (2018). Digital revolution and Big Data: A new revolution in agriculture. *CAB Reviews: Perspectives in Agriculture, Veterinary Science, Nutrition and Natural Resources*, 13(021), 1–7. doi: [10.1079/PAVSNNR201813021](https://doi.org/10.1079/PAVSNNR201813021)
- Hostiou, N., Vollet, D., Benoit, M., & Delfosse, C. (2020). Employment and farmers' work in European ruminant livestock farms: A review. *Journal of Rural Studies*, 74(January), 223–234. doi: [10.1016/j.jrurstud.2020.01.008](https://doi.org/10.1016/j.jrurstud.2020.01.008)
- Hostiou, Nathalie, & Dedieu, B. (2012). A method for assessing work productivity and flexibility in livestock farms. *Animal*, 6(5), 852–862. doi: [10.1017/S1751731111002084](https://doi.org/10.1017/S1751731111002084)
- Hostiou, Nathalie, Fagon, J., Chauvat, S., Turlot, A., Kling-Eveillard, F., Boivin, X., & Allain, C. (2017). Impact of precision livestock farming on work and human-animal interactions on dairy farms. A review. *Biotechnology, Agronomy and Society and Environment*, 21(4), 268–275. doi: [10.25518/1780-4507.13706](https://doi.org/10.25518/1780-4507.13706)
- Kawamura, N., & Namikawa, K. (1989). Robots in agriculture. *Advanced Robotics*, 3(4), 311–320. doi: [10.1163/156855389X00253](https://doi.org/10.1163/156855389X00253)
- Koutsos, T., & Menexes, G. (2017). Benefits from the adoption of precision agriculture technologies. A systematic review. *18th Panhellenic Forestry Congress & International Workshop "Information Technology, Sustainable Development, Scientific Network & Nature Protection,"* (November), 12. Retrieved from <http://ikee.lib.auth.gr/record/293951>
- Kristal, T., & Cohen, Y. (2017). The causes of rising wage inequality: The race between institutions and technology. *Socio-Economic Review*, 15(1), 187–212. doi: [10.1093/ser/mww006](https://doi.org/10.1093/ser/mww006)
- Lowenberg-DeBoer, J., Huang, I. Y., Grigoriadis, V., & Blackmore, S. (2020). Economics of robots and automation in field crop production. *Precision Agriculture*, 21(2), 278–299. doi: [10.1007/s11119-019-09667-5](https://doi.org/10.1007/s11119-019-09667-5)
- Malanski, P. D., Schiavi, S., & Dedieu, B. (2019). Characteristics of "work in agriculture" scientific communities. A bibliometric review. *Agronomy for Sustainable Development*, 39(4). doi: [10.1007/s13593-019-0582-2](https://doi.org/10.1007/s13593-019-0582-2)
- Methley, A. M., Campbell, S., Chew-Graham, C., McNally, R., & Cheraghi-Sohi, S. (2014). PICO, PICOS and SPIDER: A comparison study of specificity and sensitivity in three search tools for qualitative systematic reviews. *BMC Health Services Research*, 14(1). doi: [10.1186/s12913-014-0579-0](https://doi.org/10.1186/s12913-014-0579-0)
- Meyer, J.-A. (2015). *Dei ex Machinis : Volume III - De Jean-Baptiste Schwilgué au milieu du XXème siècle*. Les Editions du Net.
- Moher, D., Liberati, A., Tetzlaff, J., & Altman, D. G. (2010). Preferred reporting items for systematic reviews and meta-analyses: The PRISMA statement. *International Journal of Surgery*, 8(5), 336–341. doi: [10.1016/j.ijsu.2010.02.007](https://doi.org/10.1016/j.ijsu.2010.02.007)
- Ouzzani, M., Hammady, H., Fedorowicz, Z., & Elmagarmid, A. (2016). Rayyan-a web and mobile app for systematic reviews. *Systematic Reviews*, 5(1), 1–10. doi: [10.1186/s13643-016-0384-4](https://doi.org/10.1186/s13643-016-0384-4)
- Petticrew, M., & Roberts, H. (2006). Systematic Reviews in the Social Sciences. In *Blackwell Publishing*.
- Reddy, N. V., Reddy, A. V. V., Pranavadihya, S., & Kumar, J. J. (2016). A critical review on agricultural robots. *International Journal of Mechanical Engineering and Technology*, 7(4), 183–188.
- Rifkin, J. (1995). *The End of the Work*. G. P. Putnam's Sons.
- Rotz, C. A., Coirer, C. U., & Soder, K. J. (2003). Automatic Milking Systems, Farm Size, and Milk Production. *Journal of Dairy Science*, 86(12), 4167–4177. doi: [10.3168/JDS.S0022-0302\(03\)74032-6](https://doi.org/10.3168/JDS.S0022-0302(03)74032-6)
- Rotz, S., Duncan, E., Small, M., Botschner, J., Dara, R., Mosby, I., ... Fraser, E. D. G. (2019). The Politics of Digital Agricultural Technologies: A Preliminary Review. *Sociologia Ruralis*, 59(2), 203–229. doi: [10.1111/soru.12233](https://doi.org/10.1111/soru.12233)
- Rotz, S., Gravely, E., Mosby, I., Duncan, E., Finnis, E., Horgan, M., ... Fraser, E. (2019). Automated pastures and the digital divide: How agricultural technologies are shaping labour and rural communities. *Journal of Rural Studies*, 68, 112–122. doi: [10.1016/J.JRURSTUD.2019.01.023](https://doi.org/10.1016/J.JRURSTUD.2019.01.023)
- Servière, G., Chauvat, S., Hostiou, N., & Cournut, S. (2019). Le travail en élevage et ses mutations. *INRA Productions*

*Animales*, 32(1), 13–24. doi: [10.20870/productions-animales.2019.32.1.2418](https://doi.org/10.20870/productions-animales.2019.32.1.2418)

Sistler, F. E. (1987). Robotics and Intelligent Machines in Agriculture. *IEEE Journal on Robotics and Automation*, 3(1), 3–6. doi: [10.1109/JRA.1987.1087074](https://doi.org/10.1109/JRA.1987.1087074)

Tchayanov, A. (1990). *L'Organisation de l'Economie Paysanne*. Paris: Librairie du Regard.

Yaghoubi, S., Akbarzadeh, N. A., Bazargani, S. S., Bazargani, S. S., Bamizan, M., & Asl, M. I. (2013). Autonomous robots for agricultural tasks and farm assignment and future trends in agro robots. *International Journal of Mechanical and Mechatronics Engineering*, 13(3), 1–6.
