# Supplementary material for: Robots and transformations of work in farm: a systematic review of the literature and a research agenda
Source: Springer Nature journal article supplement (doi:10.1007/s13593-022-00796-2), 2022-06-30
Supplement: MOESM2 [file 13593_2022_796_MOESM2_ESM.pdf]

# Automatic Milking System and Reduction in Working Time: Bias Analysis

## 1. Design of a critical appraisal checklist

### 1.1 Critical appraisal checklist: questions

#### **Criteria 1: Is the diversity of farming system considered and consequently the representativeness of the sample considered?**

The diversity of farms is a well-known reality (Bosc et al., 2018; Gasselin et al., 2020). This diversity of farms can be elaborated with regard to a wide variety of criteria: size, socio-technical systems, production systems, relationship to the market, etc. The inclination to adopt an innovation depends closely on the type of farm. In particular, the literature shows that the adoption rate of AMS depends on the type of farm (Castro et al., 2015; Gargiulo et al., 2018; Moyes et al., 2014; Veyssset et al., 2001). The working time on a farm depends closely on the work organisation, which in turn depends on the production system considered, the level of equipment, the size of the herd, etc. (Cournut et al., 2018). Therefore, the type of farm chosen for the study can influence the working time and thus the evolution of this time following the adoption of AMS. It seems essential to consider the diversity of farms and to integrate it in the research to limit the risks of bias linked to sampling.

#### **Criteria 2: Is the social diversity of the work considered?**

Today, farming is still mainly family-based, particularly in the European dairy sector (EUROSTAT, 2020). Family farming shares its own technical and economic rationality, which differentiates it from wage labour (Bosc et al., 2018; Gasselin et al., 2014). Consequently, faced with the same innovation, the working time of a family worker may evolve differently from that of an employee. In some economic constraint, family workers work more to compensate price decrease or cost production increase. Tchayanov speaks of “*self-exploitation*” of family labour (Tchayanov, 1990). It’s an example of the link between the social organization of work and the type of socio-economic rationality. Moreover, within a single farm several social forms of labour can coexist (e.g wage labour, family labour, subcontracting). The social nature of work can influence the evolution of working time and must be considered in order to measure the real impact of AMS on working time.

#### **Criteria 3: Is the system/scale of study considered?**

Analysing the evolution of working time implies specifying the scale of analysis. The results may be different depending on the scale studied and the system associated with each scale: only milking, the breeding system (all breeding tasks) or the farming system (Cournut et al., 2018) or even the activity system (Gasselin et al., 2012). A saving in labour time associated with the arrival of AMS can be reallocated to another task newly introduced with the AMS innovation. This time can also be allocated to a previously outsourced task in order to reduce production costs and compensate for the cost of robotization. Thus the scale of analysis chosen influences the results and must be specified.

#### **Criteria 4: Is the period after AMS adoption considered?**

According to the literature, a more or less long period of adaptation is necessary for the animals and workers to find a new work organisation (Eastwood et al., 2012; Jacobs and Siegford, 2012; Jago et al., 2006; Veyssset et al., 2001). This period may be marked by a temporary increase in working time as a

result of reorganisation, learning and adaptation. Measuring changes in working time following the adoption of AMS during this period may bias the results. Indeed, this period is not representative and corresponds to a transitional state.

**Criteria 5: The evolution of working time is considered by comparing with before the AMS adoption?**

In connection with the first two questions, the comparator should consider the diversity of farms. Since not all farms have the same propensity to adopt a AMS, a major bias would be to compare a robotised population with a non-robotised population. In this case, the intervention does not take place on two comparable populations. Therefore, the best evidence is to develop a protocol that measures the evolution of working time before and after the adoption of AMS. This before-and-after comparison is also recognised in the literature as the best evidence: *“We examined the performance of the farms only after investment. It would have been preferable to make a “before and after” analysis.”* (Bijl et al., 2007) but the prevalence of accounting data in the studies makes this comparison difficult.

**Criteria 6: Does the study consider the notification monitoring time and repair times?**

According to the literature, AMS would replace physical strain with mental strain (Hostiou et al., 2017; Karttunen et al., 2016; Lunner-Kolstrup et al., 2018). This mental duty consists of the management of notifications sent to the smartphone by the AMS. This work time is difficult to measure as it crosses the boundary between professional and personal time and between personal and professional space. However, it seems essential to consider this time as it is pointed out as a major evolution of work.

**1.2 Scoring of the critical appraisal checklist**

- **Yes (Y):** Information available to validate the criteria for the bias analysis;
- **Unclear (U):** the available information is not clear enough to determine the approval of the criteria;
- **No (N):** the criteria is not taken into account;
- **Not applicable (NA):** the criteria is not applicable to the study given its methodological characteristics

*Table 1: Checklist for bias analysis*

| PICO reference | Criteria                                                                                                            | Y / U / N / NA                                                                                      |
|----------------|---------------------------------------------------------------------------------------------------------------------|-----------------------------------------------------------------------------------------------------|
| Population     | Q1. Is the diversity of farming system considered and consequently the representativeness of the sample considered? | <input type="checkbox"/> <input type="checkbox"/> <input type="checkbox"/> <input type="checkbox"/> |
| Population     | Q2. Is the social diversity of the work considered?                                                                 | <input type="checkbox"/> <input type="checkbox"/> <input type="checkbox"/> <input type="checkbox"/> |
| Population     | Q3. Is the system/scale of study considered?                                                                        | <input type="checkbox"/> <input type="checkbox"/> <input type="checkbox"/> <input type="checkbox"/> |
| Intervention   | Q4. Is the period after AMS adoption considered?                                                                    | <input type="checkbox"/> <input type="checkbox"/> <input type="checkbox"/> <input type="checkbox"/> |
| Comparator     | Q5. The evolution of working time is considered by comparing with before the AMS adoption?                          | <input type="checkbox"/> <input type="checkbox"/> <input type="checkbox"/> <input type="checkbox"/> |
| Outcome        | Q6. Does the study consider the notification/alarms monitoring time and repair times?                               | <input type="checkbox"/> <input type="checkbox"/> <input type="checkbox"/> <input type="checkbox"/> |

Table 2: Studies included in bias analysis, main characteristics, method used and discussion of the results

| Reference                   | Region                                                        | Year             | Change in labour time     | Scale/system                     | Comparison      | Method / data                                                                          | Interpretation / discussion                                                                                                                                                                                                                                                                                                                                                                                                                                                                                                                                                                                                                                                                                                                                                                                                     |
|-----------------------------|---------------------------------------------------------------|------------------|---------------------------|----------------------------------|-----------------|----------------------------------------------------------------------------------------|---------------------------------------------------------------------------------------------------------------------------------------------------------------------------------------------------------------------------------------------------------------------------------------------------------------------------------------------------------------------------------------------------------------------------------------------------------------------------------------------------------------------------------------------------------------------------------------------------------------------------------------------------------------------------------------------------------------------------------------------------------------------------------------------------------------------------------|
| (Sonck, 1996)               | N/A                                                           | 1996             | From -37.9% to -66.1%     | N/A                              | Before vs after | Simulation model (AM-HCT method and farm observation)                                  | A simulation model with few data from real observations.<br><br>The oldest study is also the one showing the greatest reduction in working time.                                                                                                                                                                                                                                                                                                                                                                                                                                                                                                                                                                                                                                                                                |
| (Mathijs, 2004)             | Western Europe<br>(Belgium, Denmark, Germany and Netherlands) | 2001-2002 (data) | -19.8%                    | Farming system?                  | Before vs after | Survey (face-to-face) (nAMS=107)                                                       | Limited information – the only study which compares samples from different countries (Belgium, Denmark, Germany and Netherlands)<br><br>'AM farmers reported an average labour saving of 19.8%, which increases to 21.3% when only farms that have kept their herd size more or less constant are considered.'                                                                                                                                                                                                                                                                                                                                                                                                                                                                                                                  |
| (Bijl et al., 2007)         | Netherlands                                                   | 2002-2003 (data) | -29%                      | Farming system (accounting data) | AMS vs CMS      | Accounting data (nAMS=31; nCMS=31)                                                     | A selection of accounting data to minimize differences between the two samples and maximize comparability between AMS and CMS farms<br><br>'In our study, the AMS31 used, on average, 29% less labor ( $P < 0.001$ ) than the CMS31. Labor costs for external workers were expected to be smaller for the AMS31 because less labor should be needed. However, in our study the use of external workers was almost equal between the groups. This meant that less home labor was used. This was also shown by the costs for external workers: the AMS31 was €7,982 and the CMS31 was €8,438.'                                                                                                                                                                                                                                    |
| (De Jong and Finnema, 2003) | North America (USA and Canada)                                | 2003             | No difference             | Workers                          | Before vs after | Interviews with farm managers                                                          | 25 AMS farms (10 USA, 15 Canada)<br><br>'Farmers expected the robot to bring about less work hours on the farm. These expectations were not entirely met, as farmers reported no decrease in work hours.'                                                                                                                                                                                                                                                                                                                                                                                                                                                                                                                                                                                                                       |
| (Gustafsson, 2004)          | N/A                                                           | 2004             | -45%?                     | Livestock farming system         | AMS vs CMS      | Observation (nAMS=4; nCMS=4)                                                           | Sample size too small and not enough information about the method.                                                                                                                                                                                                                                                                                                                                                                                                                                                                                                                                                                                                                                                                                                                                                              |
| (Oudshoorn et al., 2012)    | Denmark                                                       | 2005 (data)      | -43.4%                    | N/A                              | AMS vs CMS      | Questionnaire (nAMS=9; nCMS=9)                                                         | 'These tasks were as follows: milking, fetching and registration; treatment and surveillance; feeding; providing bedding straw in the cubicles; cleaning; and miscellaneous.'<br><br>AMS = 3.0 min per cow per day<br>CMS = 5.3 min per cow per day<br><br>Tasks concerning the robot (AMS cleaning and maintenance, alarms, checking AMS system data) not considered.                                                                                                                                                                                                                                                                                                                                                                                                                                                          |
| (Steenefeld et al., 2012)   | Netherlands                                                   | 2010 (data)      | No significant difference | Farming system (accounting data) | AMS vs CMS      | Accounting data (nAMS=63; nCMS=337)                                                    | Accounting data and representativeness : 'their clients can be characterized as farms who are interested in getting information about their financial performance to assist in making enhanced management decisions.'<br><br>'The number of full-time equivalents (FTEs) was not different between AMS and CMS farms, which is in contrast with the results of Bijl et al. (2007) who found a lower number of FTE on AMS farms. A possible explanation for this difference could be that the farmers who invested in 2003 (Bijl et al., 2007) invested to lower the amount of labour and to have more free time, as described by Mathijs (2004). Farms in the current data set may be more focused on increasing size than on having more free time, thus showing no decrease in FTE as they plan and transition to more cows.' |
| (Heikkilä et al., 2010)     | Finland                                                       | 2010             | -30%                      | Farming system (accounting data) | AMS vs CMS      | Accounting data (depends on the year considered: AMS from 59 to 82; CMS from 16 to 35) | 'We employed data on Finnish dairy farms from the EU Farm Accountancy Data Network (FADN)'                                                                                                                                                                                                                                                                                                                                                                                                                                                                                                                                                                                                                                                                                                                                      |
| (de Koning, 2011)           | Netherlands                                                   | 2011             | -29%                      | Unclear                          | AMS vs CMS      | Simulation model (Dutch case-control study)                                            | No information<br><br>'AM farms saved 29% labour, and therefore when economical results were transformed to full-time equivalents (FTEs), AM farms in the case-control study had greater revenues, margins, and gross margins per FTE than the farms with conventional milking systems.'                                                                                                                                                                                                                                                                                                                                                                                                                                                                                                                                        |
| (Butler et al., 2012)       | England                                                       | 2012             | No difference             | Workers                          | Before vs after | Interview and observations (nAMS=3)                                                    | 3 case studies:<br>- A farm with AMS for several years;<br>- Askham Bryan Agricultural College with AMS and CMS side-by-side;<br>- A farm in transition from CMS to 4 AMS<br><br>'Having a robotic milking system did change all the interviewees' lifestyles, although it did not seem to lessen the workload, "It was not a case of less work, it's just different."<br>'Despite this, the research showed that dairy farmers using AMS must deal with additional demands which are specific to this technology and so, whilst a robot takes away some of the hands-on work out of milking, the role of the stockperson has, as some interviewees described, increased, as more time had to be set aside to observe the cows with the aim of picking up health and welfare issues which had not been identified by the AMS.'  |

|                                       |              |       |               |                            |                 |                                                         |                                                                                                                                                                                                                                                    |                                                                                                                                                                                                                                                                                                                                                                                                                                                                                                                                                                                                                                                                                                                       |
|---------------------------------------|--------------|-------|---------------|----------------------------|-----------------|---------------------------------------------------------|----------------------------------------------------------------------------------------------------------------------------------------------------------------------------------------------------------------------------------------------------|-----------------------------------------------------------------------------------------------------------------------------------------------------------------------------------------------------------------------------------------------------------------------------------------------------------------------------------------------------------------------------------------------------------------------------------------------------------------------------------------------------------------------------------------------------------------------------------------------------------------------------------------------------------------------------------------------------------------------|
| <b>(Hansen, 2015)</b>                 | Norway       | 2014? | No difference | Workers                    | Before vs after | Unstructured interviews                                 | 19 AMS dairy farmers in southern Norway who had invested in robotic milking from 2005 to 2011.                                                                                                                                                     | 'Only five of the farmers mention reduced workload as an advantage with AMS. I think this female farmer in her 40s explains why many of the farmers work just as much as before (14): "We work more hours now, but that is due to increased production. The number of cows is twice as high, with the same milk quota the workload would have been reduced." 'It is not always straightforward to tell how the AMS affects the number of working hours (13): "I'm not quite sure about the number of working hours now as compared to before, ... it depends on whether you include the things you ought to do or not." What this farmer gives a hint of is that one cannot leave the cowshed completely to the AMS.' |
| (Vik et al., 2019)                    | Norway       | 2014  | Increase      | Workers                    | Before vs after | Interviews                                              | 26 AMS farmers ('eight were husband and wife families; two were husband, wife, and son families; five were two individuals who represented the farm (such as joint farmers or an accountant); ten were male farmers, and one was a female farmer') | 'Farmers expected the change in work to include more flexibility. However, some farmers did not fully account for the increased workload. In short, the working hours in-house remained approximately the same as before the installation of the AMS and the expansion, but the working hours outdoors increased.'                                                                                                                                                                                                                                                                                                                                                                                                    |
| <b>(Shortall et al., 2016)</b>        | Netherlands? | 2016  | -36%          | Activity system?           | AMS vs CMS      | Capture of real-time on-farm data (nAMS=7 ; nCMS=10)    | 'The list of tasks for AM were: checking AM system data, fetching cows indoors, fetching cows outdoors, robot cleaning maintenance, alarms, grass allocation, other dairy tasks, other enterprise tasks, and non-farm activity.'                   | 'The 36% reduction in labour associated with AM as measured in our study largely represented the reduction in time associated with the milking process from 3 hours/day with CM to 40 minutes/day with AM.'                                                                                                                                                                                                                                                                                                                                                                                                                                                                                                           |
| <b>(Lunner-Kolstrup et al., 2018)</b> | Sweden       | 2018  | Increase      | Workers                    | Before vs after | Semi-structured interviews and transect walks (nAMS=2)  | No measurements but open-ended questions in order to assess subjective experiences of working with AMS                                                                                                                                             | 'Alarms from the AMS were frequent and, especially during night-time the informants experienced the alarms as stressful, with disturbed sleep and fatigue during the following day.'                                                                                                                                                                                                                                                                                                                                                                                                                                                                                                                                  |
| (Tse et al., 2018a)                   | Canada       | 2018  | -61.5%        | Milking-related activities | Before vs after | Survey (over the phone, online and in person) (n = 215) | 'Producers who previously operated an AMS farm but later reverted back to conventional milking systems (n=3) and surveys that were terminated before completion were excluded.'                                                                    | Mean number of employees: -20%<br>Mean time spent on milking-related tasks: -61.5%<br>'The number of employees also decreased with the transition to AMS in the current study, although the difference was small. A reason why the difference in number of employees before and after the transition was not larger may be that farms were reducing the amount of family labour first before decreasing number of employees.'                                                                                                                                                                                                                                                                                         |

Table 3: Results of bias analysis

| Reference                      | Q1. Farming system diversity |                                                                                                                                                                                                                                             | Q2. Social diversity of work |                                                            | Q3. System/scale |                                                                                                                                                  | Q4. Period after AMS adoption |                                                                                                                                                                                                                           | Q5. Comparison before/after |                                                                                                                                                          | Q6. Notification /alarms monitoring |  | General observation                                   |
|--------------------------------|------------------------------|---------------------------------------------------------------------------------------------------------------------------------------------------------------------------------------------------------------------------------------------|------------------------------|------------------------------------------------------------|------------------|--------------------------------------------------------------------------------------------------------------------------------------------------|-------------------------------|---------------------------------------------------------------------------------------------------------------------------------------------------------------------------------------------------------------------------|-----------------------------|----------------------------------------------------------------------------------------------------------------------------------------------------------|-------------------------------------|--|-------------------------------------------------------|
| (Tse et al., 2018b)            | N                            | Only herd size is considered                                                                                                                                                                                                                | N                            | Family work is not considered ( <i>only employees</i> )    | Y                | "milking-related activities", no more information                                                                                                | Y                             |                                                                                                                                                                                                                           | Y                           |                                                                                                                                                          | N                                   |  |                                                       |
| (Shortall et al., 2016)        | N                            | Only two herd sizes considered<br>Sample = <b>pasture</b> -based system                                                                                                                                                                     | N                            | "farm operators" but no distinction                        | U                | Activity system ?                                                                                                                                | NA                            | Simulation model                                                                                                                                                                                                          | N                           | AMS vs CMS                                                                                                                                               | Y                                   |  |                                                       |
| (Oudshoorn et al., 2012)       | N                            | Only herd size is considered<br>Sample = <b>organic</b> dairy farm & only farm with Holstein Frisian                                                                                                                                        | N                            |                                                            | Y                | "milking, fetching and registration; treatment and surveillance; feeding; providing bedding straw in the cubicles; cleaning; and miscellaneous." | Y                             | "The extension services in Denmark registered that farm management in gen- eral adjusts to the new situation 15 months after purchase of an AMS, which all farms investigated had (Table 1)."                             | N                           | AMS vs CMS                                                                                                                                               | N                                   |  |                                                       |
| (Steenefeld et al., 2012)      | Y                            | "Therefore, it is not unexpected that smaller farms were not common in the data (Table 1) and that total land use, total milk quota, and number of cows were higher than the current Dutch average"                                         | N                            | Only FTE (full-time employee according to accounting data) | U                | Accounting data so farming system                                                                                                                | U                             | "From the 63 farms having an AMS, 9 had invested in 2010, 3 had invested in 2009, and 45 had invested in 2008 or earlier."                                                                                                | N                           | AMS vs CMS                                                                                                                                               | N                                   |  |                                                       |
| (de Koning, 2011)              | N                            |                                                                                                                                                                                                                                             | N                            |                                                            | N                |                                                                                                                                                  | N                             |                                                                                                                                                                                                                           | N                           | AMS vs CMS                                                                                                                                               | N                                   |  |                                                       |
| (Heikkilä et al., 2010)        | N                            | Only related to farm size                                                                                                                                                                                                                   | N                            | Accounting data                                            | U                | Accounting data so farming system                                                                                                                | N                             |                                                                                                                                                                                                                           | N                           | AMS vs CMS                                                                                                                                               | N                                   |  |                                                       |
| (Bijl et al., 2007)            | Y                            | "Matching was based on the year of investment in a milking system, the total milk production per year (maximum difference of 10%), and the intensity of land use (defined as milk production/ha, with a maximum difference of 1,000 kg/ha)" | N                            | Accounting data                                            | U                | Accounting data so farming system                                                                                                                | Y                             | "Adoption of an AMS is often accompanied by start-up problems; therefore, installation of the AMS must have occurred before 2003. Nine farms installed their AMS in 2003 or 2004 and had to be excluded for this reason." | N                           | AMS vs CMS<br><br>"We examined the performance of the farms only after investment. It would have been preferable to make a "before and after" analysis." | N                                   |  |                                                       |
| (Mathijs, 2004)                | N                            |                                                                                                                                                                                                                                             | N                            |                                                            | N                | No information                                                                                                                                   | N                             |                                                                                                                                                                                                                           | Y                           |                                                                                                                                                          | N                                   |  |                                                       |
| (Sonck, 1996)                  | NA                           |                                                                                                                                                                                                                                             | NA                           |                                                            | U                |                                                                                                                                                  | NA                            |                                                                                                                                                                                                                           | Y                           |                                                                                                                                                          | N                                   |  | Not relevant (to old and only a simulation)           |
| (Gustafsson, 2004)             | N                            |                                                                                                                                                                                                                                             | N                            |                                                            | U                |                                                                                                                                                  | N                             |                                                                                                                                                                                                                           | N                           | AMS vs CMS                                                                                                                                               | N                                   |  | Not enough method information's                       |
| (Lunner-Kolstrup et al., 2018) | Y                            | >300 dairy cows and more than 3 AMS (no representativeness)                                                                                                                                                                                 | Y                            | Owner and employees                                        | N<br>A           |                                                                                                                                                  | Y                             | "more than a year"                                                                                                                                                                                                        | Y                           |                                                                                                                                                          | N<br>A                              |  | No measurements but subjective experiences assessment |
| (Butler et al., 2012)          | Y                            | 3 case studies (no representativeness)                                                                                                                                                                                                      | N                            | "stockperson"                                              | N<br>A           |                                                                                                                                                  | Y                             |                                                                                                                                                                                                                           | Y                           |                                                                                                                                                          | N<br>A                              |  | No measurements but subjective experiences assessment |

|                                    |   |  |   |           |        |  |   |                                                                                                                                                                      |   |  |        |  |                                                       |
|------------------------------------|---|--|---|-----------|--------|--|---|----------------------------------------------------------------------------------------------------------------------------------------------------------------------|---|--|--------|--|-------------------------------------------------------|
| <b>(Hansen, 2015)</b>              | N |  | U | "Farmers" | N<br>A |  | Y | "19 dairy farmers located in Southern Norway who had invested in robotic milking from 2005 to 2011"                                                                  | Y |  | N<br>A |  | No measurements but subjective experiences assessment |
| <b>(Vik et al., 2019)</b>          | N |  | Y |           | N<br>A |  | Y | "Farmers were selected on the basis that they had been operating for at least three years in a new cowshed to be sure that they had sufficient experience with AMS." | Y |  | N<br>A |  | No measurements but subjective experiences assessment |
| <b>(De Jong and Finnema, 2003)</b> | Y |  | U |           | N<br>A |  | Y | "Only farms that had been using AMS technology for 6 months or more were surveyed."                                                                                  | Y |  | N<br>A |  | No measurements but subjective experiences assessment |

## 2. Recommendations

Based on the different criteria identified and the controversial results, further research is needed to understand and measure the evolution of working time as a result of robotization. The methods used should incorporate the following recommendations:

- (1) A diversity of farming systems should be included in the sample of farms studied. The size of the farm but also the technical system (pasture-based, intensive, diversified, cheese processing etc.) should be considered.
- (2) The diversity of social forms of work must be considered. For example, it would be interesting to differentiate the results according to the importance of wage labour on the farm.
- (3) Studies are needed to understand the evolution of working time at the level of the activity system. The reallocation of the time gained to other agricultural and non-agricultural activities can then be integrated. The place and role of dairy farming must be positioned in relation to other activities and as part of a coherent system in terms of both functioning and aspirations.
- (4) The adaptation period required to reorganise the work on the farm must be systematically considered. Thus, it is necessary to select farms that adopted AMS 6 months ago or more.
- (5) A diachronic comparison is essential to understand this evolution of working time (comparison before/after AMS adoption).
- (6) Protocols for studying the time spent on alarm management are needed. Although difficult, these measures should include time spent working in the private sphere.

### 3. References

- Bijl, R., Kooistra, S.R., Hogeveen, H., 2007. The profitability of automatic milking on Dutch dairy farms. *J. Dairy Sci.* 90, 239–248. [https://doi.org/10.3168/jds.S0022-0302\(07\)72625-5](https://doi.org/10.3168/jds.S0022-0302(07)72625-5)
- Bosc, P.-M., Sourisseau, J.-M., Bonnal, P., Gasselín, P., Valette, E., Bélières, J., 2018. Diversity of Family Farming Around the World. Springer Netherlands. <https://doi.org/10.1007/978-94-024-1617-6>
- Butler, D., Holloway, L., Bear, C., 2012. The impact of technological change in dairy farming: robotic milking systems and the changing role of the stockperson. *J. R. Agric. Soc. Engl.* 173, 1–6.
- Castro, A., Pereira, J.M., Amiama, C., Bueno, J., 2015. Typologies of dairy farms with automatic milking system in northwest Spain and farmers' satisfaction. *Ital. J. Anim. Sci.* 14, 207–219. <https://doi.org/10.4081/ijas.2015.3559>
- Cournut, S., Chauvat, S., Correa, P., Santos Filho, J.C., Dos, Diéguez, F., Hostiou, N., Pham, D.K., Servière, G., Sraïri, M.T., Turlot, A., Dedieu, B., 2018. Analyzing work organization on livestock farm by the Work Assessment Method. *Agron. Sustain. Dev.* 38. <https://doi.org/10.1007/s13593-018-0534-2>
- De Jong, W., Finnema, A., 2003. Survey of Management Practices of Farms Using Automatic Milking Systems in North America, in: ASAE Meeting Presentation. <https://doi.org/10.13031/2013.14997>
- de Koning, C.J.A.M., 2011. Milking machine : Robotic Milking, in: Fuquay, J.W. (Ed.), *Encyclopedia of Dairy Sciences: Second Edition*. pp. 952–958. <https://doi.org/10.1016/B978-0-12-374407-4.00360-5>
- Eastwood, C.R., Chapman, D.F., Paine, M.S., 2012. Networks of practice for co-construction of agricultural decision support systems: Case studies of precision dairy farms in Australia. *Agric. Syst.* 108, 10–18. <https://doi.org/10.1016/j.agsy.2011.12.005>
- EUROSTAT, 2020. Agriculture, forestry and fishery statistics: 2020 edition, Publications Office of the European Union. European Union.
- Gargiulo, J.I., Eastwood, C.R., Garcia, S.C., Lyons, N.A., 2018. Dairy farmers with larger herd sizes adopt more precision dairy technologies. *J. Dairy Sci.* 101, 5466–5473. <https://doi.org/10.3168/jds.2017-13324>
- Gasselín, P., Choisis, J.-P., Petit, S., Purseigle, F., Zasser, S., 2014. L'agriculture en famille: travailler, réinventer, transmettre. ECO Sciences.
- Gasselín, P., Lardon, S., Cerdan, C., Loudiyi, S., Sautier, D., 2020. The coexistence of agricultural and food models at the territorial scale: an analytical framework for a research agenda. *Rev. Agric. Food Environ. Stud.* <https://doi.org/10.1007/s41130-020-00119-7>
- Gasselín, P., Vaillant, M., Bathfield, B., 2012. The activity system. A position paper, in: 10th European IFSA Symposium "Producing and Reproducing Farming Systems: New Modes of Organization for the Sustainable Food Systems of Tomorrow". [https://doi.org/http://ifsa2012.dk/?page\\_id=808](https://doi.org/http://ifsa2012.dk/?page_id=808). hal-00742998
- Gustafsson, M., 2004. Working time studies in farms with conventional and automatic milking, in: Meijering, A., Hogeveen, H., de Koning, C.J.A.M. (Eds.), *Automatic Milking. For a Better Understanding*. Wageningen Academic Publishers, p. 488. <https://doi.org/https://doi.org/10.3920/978-90-8686-525-3>
- Hansen, B.G., 2015. Robotic milking-farmer experiences and adoption rate in Jæren, Norway. *J. Rural Stud.* 41, 109–117. <https://doi.org/10.1016/j.jrurstud.2015.08.004>
- Heikkilä, A.-M., Vanninen, L., Manninen, E., 2010. Economics of Small-Scale Dairy Farms Having Robotic Milking, in: First North American Conference on Precision Dairy Management. Toronto.
- Hostiou, N., Fagon, J., Chauvat, S., Turlot, A., Kling-Eveillard, F., Boivin, X., Allain, C., 2017. Impact of precision livestock farming on work and human-animal interactions on dairy farms. A review. *Biotechnol. Agron. Soc. Environ.* 21, 268–275. <https://doi.org/10.25518/1780-4507.13706>
- Jacobs, J.A., Siegford, J.M., 2012. Invited review: The impact of automatic milking systems on dairy cow management, behavior, health, and welfare. *J. Dairy Sci.* 95, 2227–2247. <https://doi.org/10.3168/jds.2011-4943>
- Jago, J., Davis, K., Newman, M., Woolford, M., 2006. An economic evaluation of automatic milking systems for New Zealand dairy farms, in: The New Zealand Society of Animal Production. pp. 263–269. <https://doi.org/10.1079/BJN19660078>
- Karttunen, J.P., Rautiainen, R.H., Lunner-Kolstrup, C., 2016. Occupational Health and Safety of Finnish Dairy Farmers Using Automatic Milking Systems. *Front. Public Heal.* 4, 1–11. <https://doi.org/10.3389/fpubh.2016.00147>
- Lunner-Kolstrup, C., Hörndahl, T., Karttunen, J.P., 2018. Farm operators' experiences of advanced technology and automation in Swedish agriculture: a pilot study. *J. Agromedicine* 23, 215–226. <https://doi.org/10.1080/1059924X.2018.1458670>
- Mathijs, E., 2004. Socio-economic aspects of automatic milking, in: Meijering, A., Hogeveen, H., de Koning, C.J.A.M. (Eds.), *Automatic Milking. For a Better Understanding*. Wageningen Academic Publishers, pp. 46–55. <https://doi.org/https://doi.org/10.3920/978-90-8686-525-3>
- Moyes, K.M., Ma, L., McCoy, T.K., Peters, R.R., 2014. A survey regarding the interest and concern associated with transitioning from conventional to automated (robotic) milking systems for managers of small-to medium-sized dairy farms. *Prof. Anim. Sci.* 30, 418–422. <https://doi.org/10.15232/pas.2014-01327>
- Oudshoorn, F.W., Kristensen, T., Van Der Zijpp, A.J., de Boer, I.J.M., 2012. Sustainability evaluation of automatic and conventional milking systems on organic dairy farms in Denmark. *NJAS - Wageningen J. Life Sci.* 59, 25–33. <https://doi.org/10.1016/j.njas.2011.05.003>
- Shortall, J., Shalloo, L., Foley, C., Sleator, R.D., O'Brien, B., 2016. Investment appraisal of automatic milking



- and conventional milking technologies in a pasture-based dairy system. *J. Dairy Sci.* 99, 7700–7713. <https://doi.org/10.3168/jds.2016-11256>
- Sonck, B.R., 1996. Labour organisation on robotic milking dairy farms.
- Steeneveld, W., Tauer, L.W., Hogeveen, H., Oude Lansink, A.G.J.M., 2012. Comparing technical efficiency of farms with an automatic milking system and a conventional milking system. *J. Dairy Sci.* 95, 7391–7398. <https://doi.org/10.3168/JDS.2012-5482>
- Tchayanov, A., 1990. *L'Organisation de l'Economie Paysanne*. Librairie du Regard, Paris.
- Tse, C., Barkema, H.W., DeVries, T.J., Rushen, J., Pajor, E.A., 2018a. Impact of automatic milking systems on dairy cattle producers' reports of milking labour management, milk production and milk quality. *Animal* 12, 2649–2656. <https://doi.org/10.1017/S1751731118000654>
- Tse, C., Barkema, H.W., DeVries, T.J., Rushen, J., Vasseur, E., Pajor, E.A., 2018b. Producer experience with transitioning to automatic milking: Cow training, challenges, and effect on quality of life. *J. Dairy Sci.* 101, 9599–9607. <https://doi.org/10.3168/jds.2018-14662>
- Veysset, P., Wallet, P., Prugnard, E., 2001. Automatic milking systems: characterising the farms equipped with AMS, impact and economic simulations, in: Conference on "Physiological and Technical Aspects of Machine Milking." pp. 141–150.
- Vik, J., Stræte, E.P., Hansen, B.G., Nærlund, T., 2019. The political robot – The structural consequences of automated milking systems (AMS) in Norway. *NJAS - Wageningen J. Life Sci.* 90–91, 1–9. <https://doi.org/10.1016/j.njas.2019.100305>
