# Supplementary material for: Robots and transformations of work in farm: a systematic review of the literature and a research agenda
Source: Springer Nature journal article supplement (doi:10.1007/s13593-022-00796-2), 2022-06-30
Supplement: MOESM4 [file 13593_2022_796_MOESM4_ESM.pdf]

## Full-text records included and records excluded with reasons for exclusion

Supplementary table 2a: Full-text records included (n = 90)

| Author                                                                         | Year | Title                                                                                                                                                                                         | Journal / Proceedings                                | volume | issue | pages   |
|--------------------------------------------------------------------------------|------|-----------------------------------------------------------------------------------------------------------------------------------------------------------------------------------------------|------------------------------------------------------|--------|-------|---------|
| Alarcon, C.                                                                    | 2021 | Agrarian questions, digitalisation of the countryside, immigrant labour in agriculture and the official discourses on rural development in the Uppsala region, Sweden                         | Italian Review of Agricultural Economics             | 76     | 1     | 19-32   |
| Bear, Christopher; Holloway, Lewis                                             | 2015 | Country Life: Agricultural Technologies and the Emergence of New Rural Subjectivities                                                                                                         | Geography Compass                                    | 0      | 0     | 0       |
| Bear, Christopher; Holloway, Lewis                                             | 2018 | Redistributing Labour in Automated Milking Systems and the More-Than-Human (Co)Production of Dairy Farming                                                                                    | The Sage handbook of Nature                          | 0      | 0     | 0       |
| Bear, Christopher; Holloway, Lewis                                             | 2019 | Beyond resistance: Geographies of divergent more-than-human conduct in robotic milking                                                                                                        | Geoforum                                             | 104    | 0     | 212-221 |
| Bergman, K., Rabinowicz, E.,                                                   | 2013 | Adoption of the Automatic Milking System by Swedish Milk Producers.                                                                                                                           | Working paper                                        |        |       |         |
| Bijl, R.; Kooistra, S. R.; Hogeveen, Henk                                      | 2007 | The profitability of automatic milking on Dutch dairy farms                                                                                                                                   | Journal of Dairy Science                             | 90     | 1     | 239-248 |
| Bisaglia C., Belle Z., Van den Berg G., & Pompe J.                             | 2012 | Automatic vs. Conventional Feeding Systems in Robotic Milking Dairy Farms: a Survey in the Netherlands.                                                                                       | Working paper                                        |        |       |         |
| Bugge, C.T., Skibrek, P.K.,                                                    | 2019 | Success with AMS: a Quantitative Study of what Determines Success of Farmers Using Automatic Milking Systems (AMS) in Norway                                                                  | Thesis                                               |        |       |         |
| Butler, Deborah; Holloway, Lewis; Bear, Christopher                            | 2012 | The impact of technological change in dairy farming: robotic milking systems and the changing role of the stockperson                                                                         | Journal of the Royal Agricultural Society of England | 0      | 0     | 0       |
| Butler, Deborah; Holloway, Lewis                                               | 2016 | Technology and Restructuring the Social Field of Dairy Farming: Hybrid Capitals, 'Stockmanship' and Automatic Milking Systems                                                                 | Sociologia Ruralis                                   | 56     | 4     | 513-530 |
| Caffaro, Federica; Cavallo, Eugenio                                            | 2019 | The effects of individual variables, farming system characteristics and perceived barriers on actual use of smart farming technologies: Evidence from the piedmont region, northwestern Italy | Agriculture (Switzerland)                            | 9      | 5     | 0       |
| Carolan, Michael                                                               | 2019 | Automated agrifood futures: robotics, labor and the distributive politics of digital agriculture                                                                                              | Journal of Peasant Studies                           | 47     | 1     | 184-207 |
| Castro, Angel; Pereira, J. M.; Amiama, Carlos; Bueno, Javier                   | 2015 | Typologies of dairy farms with automatic milking system in northwest Spain and farmers' satisfaction                                                                                          | Italian Journal of Animal Science                    | 14     | 2     | 207-219 |
| Christiaensen, L., Rutledge, Z., Taylor, J.E.                                  | 2020 | The Future of Work in Agriculture: Some Reflections                                                                                                                                           | Policy Research Working Paper - World Bank Group     |        |       | janv-25 |
| Cornou, Cecile                                                                 | 2009 | Automation systems for farm animals: potential impacts on the human-animal relationship and on animal welfare                                                                                 | Anthrozoos                                           | 22     | 3     | 213-220 |
| Da Borso, Francesco; Chiumenti, Alessandro; Sigura, Maurizia; Pezzuolo, Andrea | 2017 | Influence of automatic feeding systems on design and management of dairy farms                                                                                                                | Journal of Agricultural Engineering                  | 48     | 0     | 48-52   |
| De Jong, Wilco; Finnema, Albrecht                                              | 2003 | Survey of Management Practices of Farms Using Automatic Milking Systems in North America                                                                                                      | ASAE Meeting Presentation                            | 0      | 0     | 0       |
| de Koning, C. J. A. M.                                                         | 2011 | Milking machine: Robotic Milking                                                                                                                                                              | Encyclopedia of Dairy Sciences: Second Edition       | 0      | 0     | 952-958 |
| Dijkhuizen, A.A.; Huirne, R.B.M.; Harsh, S.B.; Gardner, B20R.W.                | 1997 | Economics of robot application                                                                                                                                                                | Computers and Electronics in Agriculture             | 17     | 1     | 111-121 |
| Drach, Uri; Halachmi, Ilan; Pnini, Tal; Izhaki, Ido; Degani, Amir              | 2017 | Automatic herding reduces labour and increases milking frequency in robotic milking                                                                                                           | Biosystems Engineering                               | 155    | 0     | 134-141 |
| Driessen, Clemens; Heutinck, Leonie F. M.                                      | 2014 | Cows desiring to be milked? Milking robots and the co-evolution of ethics and technology on Dutch dairy farms                                                                                 | Agriculture and Human Values                         | 32     | 1     | 43891   |
| Ferland, J.; Vasseur, E.; Duplessis, M.; Pajor, E. A.; Pellerin, D.            | 2016 | Economic impact of introducing automatic milking system on Canadian dairy farms                                                                                                               | Journal of Animal Science                            | 0      | 0     | 0       |

|                                                                                                                                |      |                                                                                                                                   |                                                                |     |   |           |
|--------------------------------------------------------------------------------------------------------------------------------|------|-----------------------------------------------------------------------------------------------------------------------------------|----------------------------------------------------------------|-----|---|-----------|
| Finstad, T., Aune, M., Egseth, K.A.,                                                                                           | 2021 | The domestication triangle: how humans, animals and technology shape each other – the case of automated milking systems.          | Journal of Rural Studies                                       | 84  |   | 211-220   |
| Gallardo, R. Karina; Sauer, Johannes                                                                                           | 2018 | Adoption of Labor-Saving Technologies in Agriculture                                                                              | Annual Review of Resource Economics                            | 10  | 0 | 185-206   |
| Gargiulo, J. I.; Eastwood, C. R.; Garcia, S. C.; Lyons, N. A.                                                                  | 2018 | Dairy farmers with larger herd sizes adopt more precision dairy technologies                                                      | Journal of Dairy Science                                       | 0   | 0 | 0         |
| Gargiulo, J.I. and Lyons, N.A. and Kempton, K. and Armstrong, D.A. and Garcia, S.C.                                            | 2020 | Physical and economic comparison of pasture-based automatic and conventional milking systems                                      | Journal of Dairy Science                                       | 103 | 9 | 8231-8240 |
| Gleeson, D.; O'Brien, B.; O'Donovan, K.                                                                                        | 2008 | The labour input associated with calf care on Irish dairy farms                                                                   | Livestock Science                                              | 116 | 1 | 82-89     |
| Grothmann A., Nydegger F., Häußermann A., & Hartung E.                                                                         | 2010 | Automatic Feeding System (AFS) – Potential for Optimisation in Dairy Farming. Landtechnik                                         | Landtechnik                                                    |     | 3 | 129-131   |
| Gustafsson, Mats                                                                                                               | 2004 | Working time studies in farms with conventional and automatic milking                                                             | Automatic milking. For a better understanding.                 | 0   | 0 | 0         |
| Hansen, Bjorn Gunnar                                                                                                           | 2015 | Robotic milking-farmer experiences and adoption rate in Jaeren, Norway                                                            | Journal of Rural Studies                                       | 41  | 0 | 109-117   |
| Hansen, B.G., Herje, H.O., Høva                                                                                                | 2019 | Profitability on dairy farms with automatic milking systems compared to farms with conventional milking systems.                  | International Food and Agribusiness Management Review          | 22  | 2 | 215-228   |
| Hansen, B.G. and Bugge, C.T. and Skibrek, P.K.                                                                                 | 2020 | Automatic milking systems and farmer wellbeing - exploring the effects of automation and digitalization in dairy farming          | Journal of Rural Studies                                       | 80  |   | 469-480   |
| Hansen, B.G. and Stræte, E.P.                                                                                                  | 2020 | Dairy farmers' job satisfaction and the influence of automatic milking systems                                                    | NJAS - Wageningen Journal of Life Sciences                     | 92  |   |           |
| Heikkila, Anna-Maija; Vanninen, Leena; Manninen, Esa                                                                           | 2010 | Economics of Small-Scale Dairy Farms Having Robotic Milking                                                                       | First North American Conference on precision dairy management  | 0   | 0 | 0         |
| Heikkila, Anna-Maija; Myyra, Sami; Pietola, Kyosti                                                                             | 2012 | Effects of Economic Factors on Adoption of Robotics and Consequences of Automation for Productivity Growth of Dairy Farms         | Working paper                                                  | 0   | 0 | 0         |
| Hogeveen, Henk; Heemskerck, Kees; Mathijs, Erik                                                                                | 2004 | Motivations of Dutch farmers to invest in an automatic milking system or a conventional milking parlour                           | Automatic milking. For a better understanding.                 | 0   | 0 | 0         |
| Holloway, Lewis; Bear, Christopher; Wilkinson, Katy                                                                            | 2014 | Robotic milking technologies and renegotiating situated ethical relationships on UK dairy farms                                   | Agriculture and Human Values                                   | 31  | 2 | 185-199   |
| Holloway, Lewis; Bear, Christopher; Wilkinson, Katy                                                                            | 2014 | Re-capturing bovine life: Robot-cow relationships, freedom and control in dairy farming                                           | Journal of Rural Studies                                       | 33  | 0 | 131-140   |
| Holloway, Lewis; Bear, Christopher                                                                                             | 2017 | Bovine and human becomings in histories of dairy technologies: robotic milking systems and remaking animal and human subjectivity | British Society for the History of Science                     | 0   | 0 | 0         |
| Hostiou, Nathalie; Fagon, Jocelyn; Chauvat, Sophie; Turlot, Amélie; Kling-Eveillard, Florence; Boivin, Xavier; Allain, Clément | 2017 | Impact of precision livestock farming on work and human-animal interactions on dairy farms. A review                              | Biotechnology, Agronomy and Society and Environment            | 21  | 4 | 268-275   |
| Hostiou, N., Kling-Eveillard, F., Ganis, E.                                                                                    | 2017 | The effects of PLF on human-animal relationships on farm                                                                          | 8th European Conference on Precision Livestock Farming (ECPLF) |     |   |           |
| Jacobs, J. A.; Siegford, J. M.                                                                                                 | 2012 | Invited review: The impact of automatic milking systems on dairy cow management, behavior, health, and welfare                    | Journal of Dairy Science                                       | 95  | 5 | 2227-2247 |
| Jago, J. G.; Davis, K. L.; Newman, M.; Woolford, M. W.                                                                         | 2006 | An economic evaluation of automatic milking systems for New Zealand dairy farms                                                   | The New Zealand Society of Animal Production                   | 0   | 0 | 0         |
| Jensen, T.                                                                                                                     | 2004 | Expectations of automatic milking and the realized socio-economic effects                                                         | Automatic milking. For a better understanding.                 | 0   | 0 | 0         |
| Jiang, Hongzhe; Wang, Wei; Li, Chunyang; Wang, Wei                                                                             | 2017 | Innovation, practical benefits and prospects for the future development of automatic milking systems                              | Frontiers of Agricultural Science and Engineering              | 4   | 1 | 37-47     |
| Karttunen, Janne P.; Rautiainen, Risto H.; Lunner-Kolstrup, Christina                                                          | 2016 | Occupational Health and Safety of Finnish Dairy Farmers Using Automatic Milking Systems                                           | Frontiers in Public Health                                     | 4   | 0 | 0         |

|                                                                                                                                                                                                                                                                        |      |                                                                                                                                                                                      |                                                                                                 |     |    |         |
|------------------------------------------------------------------------------------------------------------------------------------------------------------------------------------------------------------------------------------------------------------------------|------|--------------------------------------------------------------------------------------------------------------------------------------------------------------------------------------|-------------------------------------------------------------------------------------------------|-----|----|---------|
| Kling-Eveillard, F., Allain, C., Boivin, X., Courboulay, V., Creach, P., Philibert, A., Ramonet, Y., Hostiou, N.                                                                                                                                                       | 2020 | Farmers' representations of the effects of precision livestock farming on human-animal relationships                                                                                 | Livestock Science                                                                               | 238 |    |         |
| Lampridi, Maria G.; Kateris, Dimitrios; Vasileiadis, Giorgos; Marinoudi, Vasso; Pearson, Simon; Sørensen, Claus G.; Balafoutis, Athanasios; Bochtis, Dionysis                                                                                                          | 2019 | A case-based economic assessment of robotics employment in precision arable farming                                                                                                  | Agronomy                                                                                        | 9   | 4  | 0       |
| Lowenberg-DeBoer, James; Huang, Iona Yuelu; Grigoriadis, Vasileios; Blackmore, Simon                                                                                                                                                                                   | 2020 | Economics of robots and automation in field crop production                                                                                                                          | Precision Agriculture                                                                           | 21  | 2  | 278-299 |
| Lundstrom, C. and Lindblom, J.                                                                                                                                                                                                                                         | 2021 | Care in dairy farming with automatic milking systems, identified using an Activity Theory lens                                                                                       | Journal of Rural Studies                                                                        | 87  |    | 386-403 |
| Lunner-Kolstrup, Christina; Hörndahl, Torsten; Karttunen, Janne P.                                                                                                                                                                                                     | 2018 | Farm operators' experiences of advanced technology and automation in Swedish agriculture: a pilot study                                                                              | Journal of Agromedicine                                                                         | 23  | 3  | 215-226 |
| Marinoudi, Vasso; Sorensen, Claus G.; Pearson, Simon; Bochtis, Dionysis                                                                                                                                                                                                | 2019 | Robotics and labour in agriculture. A context consideration                                                                                                                          | Biosystems Engineering                                                                          | 184 | 0  | 111-121 |
| Marinoudi, V and Lampridi, M and Kateris, D and Pearson, S and Sorensen, CG and Bochtis, D and Marinoudi, Vasso and Lampridi, Maria and Kateris, Dimitrios and Pearson, Simon and Sorensen, Claus Gron and Bochtis, Dionysis                                           | 2021 | The Future of Agricultural Jobs in View of Robotization                                                                                                                              | Sustainability                                                                                  | 13  | 21 |         |
| Mathijs, Erik                                                                                                                                                                                                                                                          | 2004 | Socio-economic aspects of automatic milking                                                                                                                                          | Automatic milking. For a better understanding.                                                  | 0   | 0  | 0       |
| Molfino, J.; Kerrisk, K.; García S.C.                                                                                                                                                                                                                                  | 2014 | Investigation into the labour and lifestyle impacts of automatic milking systems (AMS) on commercial farms in Australia.                                                             | Proceedings of the 5th Australasian Dairy Science Symposium, Melbourne, Australia               | 0   | 0  | 0       |
| Moyes, K. M.; Ma, L.; McCoy, T. K.; Peters, R. R.                                                                                                                                                                                                                      | 2014 | A survey regarding the interest and concern associated with transitioning from conventional to automated (robotic) milking systems for managers of small-to medium-sized dairy farms | Professional Animal Scientist                                                                   | 30  | 4  | 418-422 |
| Nabokov, VI and Novopashin, LA and Denyozhko, LV and Sadov, AA and Ziablitekaia, NV and Volkova, SA and Speshilova, IV and Nabokov, V., I and Novopashin, L. A. and Denyozhko, L., V and Sadov, A. A. and Ziablitekaia, N., V and Volkova, S. A. and Speshilova, I., V | 2020 | Applications of feed pusher robots on cattle farmings and its economic efficiency                                                                                                    | International Transaction Journal of Engineering, Management, & Applied Sciences & Technologies | 11  | 14 |         |
| Örs, A. , Oğuz, C.                                                                                                                                                                                                                                                     | 2018 | Comparison of the Economic Performance of Robotic Milking System and Conventional Milking System. Manas Journal of Agriculture Veterinary and Life Sciences, 8(2), 35-51             | Manas Journal of Agriculture Veterinary and Life Sciences                                       | 8   | 2  | 35-51   |
| Oudshoorn, F. W.; Kristensen, T.; Van Der Zijpp, A. J.; de Boer, I. J. M.                                                                                                                                                                                              | 2012 | Sustainability evaluation of automatic and conventional milking systems on organic dairy farms in Denmark                                                                            | NJAS - Wageningen Journal of Life Sciences                                                      | 59  | 1  | 25-33   |
| Pezzuolo, Andrea; Chiumenti, Alessandro; Sartori, Luigi; Da Borso, Francesco                                                                                                                                                                                           | 2016 | Automatic Feeding System: Evaluation of energy consumption and labour requirement in north-east Italy dairy farm                                                                     | Engineering for Rural Development                                                               | 0   | 0  | 882-887 |
| Pezzuolo et al.                                                                                                                                                                                                                                                        | 2017 | Estimating efficiency in automatic milking systems                                                                                                                                   | Journal of Dairy Science                                                                        |     |    | 929-936 |
| Pinzke, Stefan                                                                                                                                                                                                                                                         | 2016 | Comparison of Working Conditions and Prevalence of Musculoskeletal Symptoms among Dairy Farmers in Southern Sweden over a 25-Year Period                                             | Frontiers in Public Health                                                                      | 4   | 0  | 0       |
| Porcher, Jocelyne; Schmitt, Tiphaine                                                                                                                                                                                                                                   | 2012 | Dairy cows: Workers in the shadows?                                                                                                                                                  | Society and Animals                                                                             | 20  | 1  | 39-60   |

*Supplementary material*

*Martin et al. 2022*

|                                                                                                                                                                                                          |      |                                                                                                                                                       |                                                                                                 |     |    |           |
|----------------------------------------------------------------------------------------------------------------------------------------------------------------------------------------------------------|------|-------------------------------------------------------------------------------------------------------------------------------------------------------|-------------------------------------------------------------------------------------------------|-----|----|-----------|
| Prause, L and Prause, Louisa                                                                                                                                                                             | 2021 | Digital Agriculture and Labor: A Few Challenges for Social Sustainability                                                                             | Sustainability                                                                                  | 13  | 11 |           |
| Reddy, N. Vamshidhar; Reddy, A. V. Vishnu Vardhan; Pranavadithya, S.; Kumar, J. Jagadesh                                                                                                                 | 2016 | A critical review on agricultural robots                                                                                                              | International Journal of Mechanical Engineering and Technology                                  | 7   | 4  | 183-188   |
| Rossing, W.; Hogewerf, P. H.; Ipema, A. H.; Ketelaar-De-Lauwere, C. C.; de Koning, C. J. A. M.                                                                                                           | 1997 | Robotic milking in dairy farming                                                                                                                      | Netherlands Journal of Agricultural Science                                                     | 45  | 1  | 15-31     |
| Rotz, C. A.; Coiner, C. U.; Soder, K. J.                                                                                                                                                                 | 2003 | Automatic Milking Systems, Farm Size, and Milk Production                                                                                             | Journal of Dairy Science                                                                        | 86  | 12 | 4167-4177 |
| Rotz, Sarah; Gravely, Evan; Mosby, Ian; Duncan, Emily; Finnis, Elizabeth; Horgan, Mervyn; LeBlanc, Joseph; Martin, Ralph; Neufeld, Hannah Tait; Nixon, Andrew; Pant, Laxmi; Shalla, Vivian; Fraser, Evan | 2019 | Automated pastures and the digital divide: How agricultural technologies are shaping labour and rural communities                                     | Journal of Rural Studies                                                                        | 68  | 0  | 112-122   |
| Salfer, J. A.; Minegishi, K.; Lazarus, W.; Berning, E.; Endres, M. I.                                                                                                                                    | 2017 | Finances and returns for robotic dairies                                                                                                              | Journal of Dairy Science                                                                        | 100 | 9  | 7739-7749 |
| Schewe, Rebecca L.; Stuart, Diana                                                                                                                                                                        | 2015 | Diversity in agricultural technology adoption: How are automatic milking systems used and to what end?                                                | Agriculture and Human Values                                                                    | 32  | 2  | 199-213   |
| Seabrook, M. F.                                                                                                                                                                                          | 1992 | The perception by stockpersons of the effect on their esteem, self-concept and satisfaction of the incorporation of automatic milking into their herd | International Symposium on Prospects for Automatic Milking                                      | 0   | 0  | 0         |
| Semin, AN and Skvortsov, EA and Skvortsova, EG and Oguz, C and Ors, A and Semin, A. N. and Skvortsov, E. A. and Skvortsova, E. G. and Oguz, Cennet and Ors, Aykut                                        | 2020 | Labor polarization in the context of agricultural robotization in the middle urals                                                                    | International Transaction Journal of Engineering, Management, & Applied Sciences & Technologies | 11  | 14 |           |
| Shortall, J.; Shalloo, L.; Foley, C.; Sleator, R. D.; O'Brien, B.                                                                                                                                        | 2016 | Investment appraisal of automatic milking and conventional milking technologies in a pasture-based dairy system                                       | Journal of Dairy Science                                                                        | 99  | 9  | 7700-7713 |
| Sinnott, AM and Kennedy, E and Bokkers, EAM and Sinnott, Alison M. and Kennedy, Emer and Bokkers, Eddie. A. M.                                                                                           | 2021 | The effects of manual and automated milk feeding methods on group-housed calf health, behaviour, growth and labour                                    | Livestock Science                                                                               | 244 |    |           |
| Sonck, B. R.                                                                                                                                                                                             | 1996 | Labour organisation on robotic milking dairy farms                                                                                                    | Book                                                                                            | 0   | 0  | 0         |
| Sparrow, R., Howard, M.                                                                                                                                                                                  | 2021 | Robots in agriculture: prospects, impacts, ethics, and policy                                                                                         | Precision Agriculture                                                                           | 22  | 3  | 818-833   |
| Speroni, M.; Pirlo, G.; Lolli, S.                                                                                                                                                                        | 2006 | Effect of automatic milking systems on milk yield in a hot environment                                                                                | Journal of Dairy Science                                                                        | 0   | 0  | 0         |
| Spykman, O. and Gabriel, A. and Ptacek, M. and Gandorfer, M.                                                                                                                                             | 2021 | Farmers' perspectives on field crop robots - Evidence from Bavaria, Germany                                                                           | Computers and Electronics in Agriculture                                                        | 186 |    |           |
| Srivastava, S.K.                                                                                                                                                                                         | 2021 | Agricultural automation: A strategic dilemma of a rich Indian farmer                                                                                  | Journal of Information Technology Teaching Cases                                                | 11  | 2  | 117-121   |
| Steenefeld, W.; Tauer, L. W.; Hogeveen, Henk; Oude Lansink, A. G. J. M.                                                                                                                                  | 2012 | Comparing technical efficiency of farms with an automatic milking system and a conventional milking system                                            | Journal of Dairy Science                                                                        | 95  | 12 | 7391-7398 |
| Stræte, E.P., Vik, J., Hansen, B.G.,                                                                                                                                                                     | 2017 | The Social Robot: A Study of the Social and Political Aspects of Automatic Milking Systems                                                            | System Dynamics and Innovation in Food Networks                                                 |     |    | 220-233   |
| Tse, C.; Barkema, H. W.; DeVries, T. J.; Rushen, J.; Pajor, E. A.                                                                                                                                        | 2017 | Effect of transitioning to automatic milking systems on producers' perceptions of farm management and cow health in the Canadian dairy industry       | Journal of Dairy Science                                                                        | 0   | 0  | 0         |
| Tse, C.; Barkema, H. W.; DeVries, T. J.; Rushen, J.; Pajor, E. A.                                                                                                                                        | 2018 | Impact of automatic milking systems on dairy cattle producers' reports of milking labour management, milk production and milk quality                 | Animal                                                                                          | 12  | 12 | 2649-2656 |
| Tse, C.; Barkema, H. W.; DeVries, T. J.; Rushen, J.; Vasseur, E.; Pajor, E. A.                                                                                                                           | 2018 | Producer experience with transitioning to automatic milking: Cow training, challenges, and effect on quality of life                                  | Journal of Dairy Science                                                                        | 101 | 10 | 9599-9607 |

*Supplementary material*

*Martin et al. 2022*

|                                                                                                                                                                                                                                                                        |      |                                                                                                         |                                                                        |       |        |           |
|------------------------------------------------------------------------------------------------------------------------------------------------------------------------------------------------------------------------------------------------------------------------|------|---------------------------------------------------------------------------------------------------------|------------------------------------------------------------------------|-------|--------|-----------|
| Veysset, P.; Wallet, P.; Prugnard, E.                                                                                                                                                                                                                                  | 2001 | Automatic milking systems: characterising the farms equipped with AMS, impact and economic simulations  | Conference on "Physiological and technical aspects of machine milking" | 0     | 0      | 0         |
| Vik, J., Stræte, E.P., Hansen, B.G., Nærland, T.                                                                                                                                                                                                                       | 2019 | The political robot – The structural consequences of automated milking systems (AMS) in Norway          | NJAS - Wageningen Journal of Life Sciences                             | 90-91 | 100305 | 0         |
| Wade, K. M.; Van Asseldonk, M. A. P. M.; Berentsen, P. B. M.; Ouweltjes, W.; Hogeveen, Henk                                                                                                                                                                            | 2004 | Economic efficiency of automatic milking systems with specific emphasis on increases in milk production | Automatic milking. For a better understanding.                         | 0     | 0      | 0         |
| Wildridge, A. M.; Thomson, P. C.; Garcia, S. C.; Jongman, E. C.; Kerrisk, K. L.                                                                                                                                                                                        | 2020 | Transitioning from conventional to automatic milking: Effects on the human-animal relationship          | Journal of Dairy Science                                               | 103   | 2      | 1608-1619 |
| Woo, S and Uyeh, DD and Kim, J and Kim, Y and Kang, S and Kim, KC and Lee, SY and Ha, Y and Lee, WS and Woo, Seungmin and Uyeh, Daniel Dooyum and Kim, Junhee and Kim, Yeongsu and Kang, Seokho and Kim, Kyoung Chul and Lee, Si Young and Ha, Yushin and Lee, Won Suk | 2020 | Analyses of Work Efficiency of a Strawberry-Harvesting Robot in an Automated Greenhouse                 | Agronomy                                                               | 10    | 11     |           |
| Wouter Bac, C.; Van Henten, E. J.; Hemming, J.; Edan, Yael                                                                                                                                                                                                             | 2014 | Harvesting Robots for High-value Crops: State-of-the-art Review and Challenges Ahead                    | Journal of Field Robotics                                              | 31    | 6      | 888-911   |

**Supplementary table 2b:** Records excluded with reasons for exclusion (n= 122)

| Authors                                                                                                                                                   | Year | Title                                                                                                                   | Journal / Proceedings                                                             | Volume | Issue | Pages   | Reason for exclusion     |
|-----------------------------------------------------------------------------------------------------------------------------------------------------------|------|-------------------------------------------------------------------------------------------------------------------------|-----------------------------------------------------------------------------------|--------|-------|---------|--------------------------|
| Abeni, F. and Petrera, F. and Galli, A.                                                                                                                   | 2019 | A Survey of Italian Dairy Farmers' Propensity for Precision Livestock Farming Tools                                     | Animals                                                                           | 9      | 5     |         | No robot                 |
| Aitkhozhin, S. K. and Balkibayeva, A. M. and Ramazanova, R. H. and Yermekov, F. K. and Karsybayeva, K. A.                                                 | 2019 | Economic assessment of precision agriculture project in Kazakhstan                                                      | Periodico Tche Quimica                                                            | 16     | 33    | 304-314 | No robot                 |
| Andre, G. and Berentsen, P. B. M. and Engel, B. and de Koning, C. J. A. M. and Oude Lansink, A. G. J. M.                                                  | 2010 | Increasing the revenues from automatic milking by using individual variation in milking characteristics                 | Journal of Dairy Science                                                          | 93     | 3     | 942-953 | No work dimension        |
| Aravind, K. R. and Raja, P. and Perez-Ruiz, M.                                                                                                            | 2017 | Task-based agricultural mobile robots in arable farming: A review                                                       | Spanish Journal of Agricultural Research                                          | 15     | 1     |         | No work dimension        |
| Armstrong, D. V. and Daugherty, L. S.                                                                                                                     | 1997 | Milking robots in large dairy farms                                                                                     | Computers and Electronics in Agriculture                                          | 17     | 1     | 123-128 | No work dimension        |
| Ayerdi Gotor, A. and Marraccini, E. and Leclercq, C. and Scheurer, O.                                                                                     | 2020 | Precision farming uses typology in arable crop-oriented farms in northern France                                        | Precision Agriculture                                                             | 21     | 1     | 131-146 | No robot                 |
| Bohlandt, A. and Schierl, R. and Heizinger, J. and Dietrich-Gumperlein, G. and Zahradnik, E. and Bruckmaier, L. and Sultz, J. and Raulf, M. and Nowak, D. | 2016 | Cow hair allergen concentrations in dairy farms with automatic and conventional milking systems: From stable to bedroom | International Journal of Hygiene and Environmental Health                         | 219    | 1     | 79-87   | No farm system or worker |
| Balafoutis, A. and Beck, B. and Fountas, S. and Vangeyte, J. and Van Der Wal, T. and Soto, I. and Gomez-Barbero, M. and Barnes, A. and Eory, V.           | 2017 | Precision agriculture technologies positively contributing to ghg emissions mitigation, farm productivity and economics | Sustainability (Switzerland)                                                      | 9      | 8     |         | No robot                 |
| Ball, D. and Ross, P. and English, A. and Milani, P. and Richards, D. and Bate, A. and Uperoft, B. and Wyeth, G. and Corke, P.                            | 2017 | Farm Workers of the Future Vision-Based Robotics for Broad-Acre Agriculture                                             | Ieee Robotics & Automation Magazine                                               | 24     | 3     | 97-107  | No farm system or worker |
| Bear, C. and Wilkinson, K. and Holloway, L.                                                                                                               | 2017 | Visualizing Human-Animal-Technology Relations                                                                           | Society & Animals                                                                 | 25     | 3     | 225-256 | No work dimension        |
| Bechar, A.                                                                                                                                                | 2010 | Robotics in horticultural field production                                                                              | Stewart Postharvest Review                                                        | 6      | 3     |         | No work dimension        |
| Bechar, A. and Edan, Y.                                                                                                                                   | 2003 | Human-robot collaboration for improved target recognition of agricultural robots                                        | Industrial Robot-the International Journal of Robotics Research and Application   | 30     | 5     | 432-436 | No farm system or worker |
| Bewley, J.; Palmer, R.W.; Jackson-Smith, D.B.                                                                                                             | 2001 | Modeling Milk Production and Labor Efficiency in Modernized Wisconsin Dairy Herds                                       | Journal of Dairy Science                                                          |        |       |         | No robot                 |
| Bhambota, S. and Dixit, A. K. and Manes, G. S. and Dhatt, A. S. and Singh, S. K. and Singh, A.                                                            | 2018 | Field evaluation of a semi-automatic vegetable transplanter for major vegetable crops                                   | Indian Journal of Agricultural Sciences                                           | 88     | 11    | 107-111 | No robot                 |
| Billon P, Tournaire F.                                                                                                                                    | 2002 | Impact of automatic milking systems on milk quality and farm management: the French experience                          | Paper presented at the North American Conference on Robotic Milking, 1st, Toronto |        |       |         | No paper access          |

|                                                                                                                                                                                       |      |                                                                                                                                                                     |                                                                                                                                   |    |    |           |                          |
|---------------------------------------------------------------------------------------------------------------------------------------------------------------------------------------|------|---------------------------------------------------------------------------------------------------------------------------------------------------------------------|-----------------------------------------------------------------------------------------------------------------------------------|----|----|-----------|--------------------------|
| Bisaglia C., Pirlo G., Capelletti M                                                                                                                                                   | 2008 | A simulated comparison between investment and labour requirements for a conventional mixer feeder wagon and an automated total mixed ration system                  | in Proceeding of International Conference on "Agricultural Engineering & Industry exhibition - AgEng", June 23-25, Crete, Greece. |    |    |           | No paper access          |
| Bloss, R.                                                                                                                                                                             | 2014 | Robot innovation brings to agriculture efficiency, safety, labor savings and accuracy by plowing, milking, harvesting, crop tending/picking and monitoring          | Industrial Robot-an International Journal                                                                                         | 41 | 6  | 493-499   | No farm system or worker |
| Bucci, G. and Bentivoglio, D. and Finco, A.                                                                                                                                           | 2018 | PRECISION AGRICULTURE AS A DRIVER FOR SUSTAINABLE FARMING SYSTEMS: STATE OF ART IN LITTERATURE AND RESEARCH                                                         | Quality-Access to Success                                                                                                         | 19 |    | 114-121   | No robot                 |
| Castro, A. and Pereira, J. M. and Amiama, C. and Bueno, J.                                                                                                                            | 2012 | Estimating efficiency in automatic milking systems                                                                                                                  | Journal of Dairy Science                                                                                                          | 95 | 2  | 929-936   | No work dimension        |
| Cosma, A. and Cristea, L. and Zamfira, C. S. and Luculescu, M. C.                                                                                                                     | 2020 | Work-in-Progress: Contemporary Barriers Faced by Precision Agriculture, New Paradigms and Proposals for Future Advance                                              | Lecture Notes in Networks and Systems                                                                                             | 80 |    | 698-707   | No robot                 |
| De Koning, K.                                                                                                                                                                         | 2006 | Automatic milking: State of the art: Current and future developments                                                                                                | VDI Berichte                                                                                                                      |    |    | 137-148   | No paper access          |
| Dela Rue, B. T. and Eastwood, C. R. and Edwards, J. P. and Cuthbert, S.                                                                                                               | 2019 | New Zealand dairy farmers preference investments in automation technology over decision-support technology                                                          | Animal Production Science                                                                                                         | 60 | 1  | 133-137   | No robot                 |
| Derus, S. R. M. and Zulkifli, C. Z. and Ismail, N. and Aziz, M. S. A. and Hassan, N. H. A. and Noerhartati, E. and Andjarwati, T. and Sustiyatik, E. and Ridwan, A. and Susilo, K. E. | 2019 | Increasing productivity in agriculture through integrated smart architecture of irrigation systems with LORA technology                                             | International Journal of Innovation, Creativity and Change                                                                        | 9  | 11 | 264-274   | No robot                 |
| Désire C. & Hostiou N.,                                                                                                                                                               | 2015 | L'élevage de précision : quels changements dans l'organisation du travail et la gestion de données en élevage ?                                                     | In : Actes des 4e Rencontres nationales sur le travail en élevage, 5-6 novembre 2015, Dijon, France. Paris : Inra, 62-63          |    |    |           | No eligibility           |
| Devir, S. and Maltz, E. and Metz, J. H. M.                                                                                                                                            | 1997 | Strategic management planning and implementation at the milking robot dairy farm                                                                                    | Computers and Electronics in Agriculture                                                                                          | 17 | 1  | 95-110    | No work dimension        |
| Devir, S., Ketelaar-De Lauwere, C. C., & Noordhuizen, J. P. T. M.                                                                                                                     | 1999 | The milking robot dairy farm management: operational performance characteristics and consequences                                                                   | Transactions of the ASAE, 42,                                                                                                     |    |    |           | No paper access          |
| Eastwood, C. R. and Jago, J. G. and Edwards, J. P. and Burke, J. K.                                                                                                                   | 2016 | Getting the most out of advanced farm management technologies: roles of technology suppliers and dairy industry organisations in supporting precision dairy farmers | Animal Production Science                                                                                                         | 56 | 10 | 1752-1760 | No robot                 |
| Edan, Y., Benady, M., & Miles, G. E.                                                                                                                                                  | 1992 | Economic analysis of robotic melon harvesting                                                                                                                       | Paper no.92-1512, St Joseph, MI, USA: ASAE.                                                                                       |    |    |           | No paper access          |
| Edmondson, P.                                                                                                                                                                         | 2011 | Veterinary Challenges and Opportunities with Robotic Milking                                                                                                        | Cattle Practice                                                                                                                   | 19 |    | 53-56     | No farm system or worker |
| Edmondson, P.                                                                                                                                                                         | 2012 | Mastitis control in robotic milking systems                                                                                                                         | In Practice                                                                                                                       | 34 | 5  | 260-269   | No work dimension        |
| Edmondson, P. W.                                                                                                                                                                      | 2018 | Common mastitis problems seen in robotic milking systems                                                                                                            | Cattle Practice                                                                                                                   | 26 |    | 87-88     | No work dimension        |
| Espolov, T. I. and Espolov, A. T. and Suleimenov, Z. Z. and Ospanov, B. S. and Aituganov, K. K.                                                                                       | 2019 | Economic problems of agricultural digitalization                                                                                                                    | International Journal of Management and Business Research                                                                         | 9  | 1  | 142-150   | No robot                 |
| Fennimore, S. A. and Cutulle, M.                                                                                                                                                      | 2019 | Robotic weeders can improve weed control options for specialty crops                                                                                                | Pest Management Science                                                                                                           | 75 | 7  | 1767-1774 | No work dimension        |
| Fernandez, R.                                                                                                                                                                         | 2001 | Skill-biased Technological Change and Wage Inequality: Evidence From a Plant Retooling                                                                              | American Journal of Sociology                                                                                                     |    |    |           | No robot                 |

|                                                                                                                       |      |                                                                                                                                 |                                                                                                                                                                               |    |    |           |                          |
|-----------------------------------------------------------------------------------------------------------------------|------|---------------------------------------------------------------------------------------------------------------------------------|-------------------------------------------------------------------------------------------------------------------------------------------------------------------------------|----|----|-----------|--------------------------|
| Floridi, M. and Bartolini, F. and Peerlings, J. and Polman, N. and Viaggi, D.                                         | 2013 | Modelling the adoption of automatic milking systems in Noord-Holland                                                            | Bio-based and Applied Economics                                                                                                                                               | 2  | 1  | 73-90     | No work dimension        |
| Foglia, M. M. and Gentile, A. and Reina, G.                                                                           | 2008 | Robotics for agricultural systems                                                                                               | Mechatronics and Machine Vision in Practice                                                                                                                                   |    |    | 313-332   | No farm system or worker |
| Fountas, S. and Espejo-Garcia, B. and Kasimati, A. and Mylonas, N. and Darra, N.                                      | 2020 | The Future of Digital Agriculture: Technologies and Opportunities                                                               | It Professional                                                                                                                                                               | 22 | 1  | 24-28     | No farm system or worker |
| Frost, A. R.                                                                                                          | 1990 | Robotic milking: A review                                                                                                       | Robotica                                                                                                                                                                      | 8  | 4  | 311-318   | No farm system or worker |
| Fulwider, W. K.                                                                                                       | 2014 | Dairy cattle behaviour, facilities, handling, transport, automation and well-being                                              | Livestock Handling and Transport: Fourth Edition                                                                                                                              |    |    | 116-142   | No work dimension        |
| Gaus, C. C., Urso, L.M., Minßen, T. F., & de Witte, T.                                                                | 2017 | Economics of mechanical weeding by a swarm of small field robots                                                                | 57th Annual Conference (pp. 1–4), Brunswick, Germany: German Association of Agricultural Economists (GEWISOLA).                                                               |    |    |           | No farm system or worker |
| Gibson, T.                                                                                                            | 2014 | Are you and your farm right to take on robots                                                                                   | Dairy Farmer                                                                                                                                                                  |    |    |           | No paper access          |
| Grieve, B. D. and Duckett, T. and Collison, M. and Boyd, L. and West, J. and Yin, H. J. and Arvin, F. and Pearson, S. | 2019 | The challenges posed by global broadacre crops in delivering smart agri-robotic solutions: A fundamental rethink is required    | Global Food Security-Agriculture Policy Economics and Environment                                                                                                             | 23 |    | 116-124   | No work dimension        |
| Groborz, A. and Tokarski, T. and Roman-Liu, D.                                                                        | 2011 | Analysis of Postural Load During Tasks Related to Milking Cows-A Case Study                                                     | International Journal of Occupational Safety and Ergonomics                                                                                                                   | 17 | 4  | 423-432   | No robot                 |
| Grodkowski, G. and Sakowski, T. and Puppel, K. and Baars, T.                                                          | 2018 | Comparison of different applications of automatic herd control systems on dairy farms-a review                                  | Journal of the Science of Food and Agriculture                                                                                                                                | 98 | 14 | 5181-5188 | No work dimension        |
| Grogan, A.                                                                                                            | 2012 | Smart farming                                                                                                                   | Engineering and Technology                                                                                                                                                    | 7  | 6  | 38-40     | No work dimension        |
| Harsh. S.B., Huirne, R.B.M., Dijkhuizen, A.A. and Gardner, R.W.                                                       | 1994 | Automatic milking system: An economic evaluation.                                                                               | Proc. 33rd Ann. Mtg. Natl. Mastitis Council, Arlington, Virginia, pp. 2222231. Hogewerf, P.H., Huismans, J.M., Ipema, A.H., Janssen, T. and Rossing, W. 1992. Observations of |    |    |           | No paper access          |
| Hartung, J. and Banhazi, T. and Vranken, E. and Guarino, M.                                                           | 2017 | European farmers' experiences with precision livestock farming systems                                                          | Animal Frontiers                                                                                                                                                              | 7  | 1  | 38-44     | No robot                 |
| Hogeveen, H. and Dohmen, W. and Renes, R. J. and Lam, T. J. G. M.                                                     | 2012 | Attitudes with regard to animal management of farmers with an automatic milking system and their relationship with udder health | Udder Health and Communication                                                                                                                                                |    |    | 164       | No work dimension        |
| Hyde J, Dunn JW, Steward A, Hollabaugh ER.                                                                            | 2007 | Robots don't get sick or get paid overtime, but are they a profitable option for milking cows?                                  | Rev. Agric. Econ.                                                                                                                                                             |    |    |           | No work dimension        |
| Hyde, J. and Dunn, J. W. and Steward, A. and Hollabaugh, E. R.                                                        | 2007 | Robots don't get sick or get paid overtime, but are they a profitable option for milking cows?                                  | Review of Agricultural Economics                                                                                                                                              | 29 | 2  | 366-380   | No work dimension        |
| Hyde, J. and Engel, P.                                                                                                | 2002 | Investing in a robotic milking system: A Monte Carlo simulation analysis                                                        | Journal of Dairy Science                                                                                                                                                      | 85 | 9  | 2207-2214 | No work dimension        |
| Ipema, A. H.                                                                                                          | 1997 | Integration of robotic milking in dairy housing systems Review of cow traffic and milking capacity aspects                      | Computers and Electronics in Agriculture                                                                                                                                      | 17 | 1  | 79-94     | No work dimension        |
| Jago, J. and Eastwood, C. and Kerrisk, K. and Yule, I.                                                                | 2013 | Precision dairy farming in Australasia: adoption, risks and opportunities                                                       | Animal Production Science                                                                                                                                                     | 53 | 9  | 907-916   | No robot                 |
| Just, R.E. and Zilberman, D.                                                                                          | 1983 | Stochastic Structure, Farm Size, and Technology Adoption in Developing Agriculture                                              | Oxford Economic Papers 35(2)                                                                                                                                                  |    |    |           | No eligibility           |



|                                                                                                                                       |      |                                                                                                                                                                                      |                                                                                                      |     |    |           |                          |
|---------------------------------------------------------------------------------------------------------------------------------------|------|--------------------------------------------------------------------------------------------------------------------------------------------------------------------------------------|------------------------------------------------------------------------------------------------------|-----|----|-----------|--------------------------|
| Kaler, J. and Ruston, A.                                                                                                              | 2019 | Technology adoption on farms: Using Normalisation Process Theory to understand sheep farmers' attitudes and behaviours in relation to using precision technology in flock management | Preventive Veterinary Medicine                                                                       | 170 |    |           | No robot                 |
| Keeper, D. M. and Kerrisk, K. L. and House, J. K. and Garcia, S. C. and Thomson, P.                                                   | 2017 | Demographics, farm and reproductive management strategies used in Australian automatic milking systems compared with regionally proximal conventional milking systems                | Australian Veterinary Journal                                                                        | 95  | 9  | 325-332   | No work dimension        |
| Klerkx, L. and Jakku, E. and Labarthe, P.                                                                                             | 2019 | A review of social science on digital agriculture, smart farming and agriculture 4.0: New contributions and a future research agenda                                                 | NJAS - Wageningen Journal of Life Sciences                                                           | 90  |    |           | No work dimension        |
| Laycock, C. L. and Street, M. J.                                                                                                      | 1984 | Development and use of an automated management system for a large dairy herd                                                                                                         | Journal of Agricultural Engineering Research                                                         | 30  |    | 265-273   | No robot                 |
| Libin, Z. and Qinghua, Y. and Guanjuan, B. and Yan, W. and Liyong, Q. and Feng, G. and Fang, X.                                       | 2008 | Overview of research on agricultural robots in China                                                                                                                                 | International Journal of Agricultural and Biological Engineering                                     | 1   | 1  |           | No farm system or worker |
| Lundqvist, P.                                                                                                                         | 2001 | Occupational health and safety of workers in agriculture and horticulture                                                                                                            | New Solutions                                                                                        | 10  | 4  | 351-365   | No robot                 |
| Maldonado, A. I. L.                                                                                                                   | 2010 | Automation and robots for handling, storing and transporting fresh horticulture produce                                                                                              | Stewart Postharvest Review                                                                           | 6   | 3  |           | No work dimension        |
| McCorkle, D. A., Dudensing, R. M., Hanselka, D., & Hellman, E. W.                                                                     | 2016 | Economics of robotic technology in texas wine grape production                                                                                                                       | San Antonio, USA: Southern Agricultural Economics Association. 2016 SAEA Annual Meeting,             |     |    |           | No farm system or worker |
| Medrano-Galarza, C. and LeBlanc, S. J. and Jones-Bitton, A. and DeVries, T. J. and Rushen, J. and de Passille, A. M. and Haley, D. B. | 2018 | Producer perceptions of manual and automated milk feeding systems for dairy calves in Canada                                                                                         | Canadian Journal of Animal Science                                                                   | 98  | 2  | 250-259   | No robot                 |
| Meijering A, von der Vorst Y, de Koning K.                                                                                            | 2000 | Implications of the introduction of automatic milking on dairy farms                                                                                                                 | Paper presented at the International Symposium on Robotic Milking, Lelystad, Neth., Aug. 17-19       |     |    |           | No paper access          |
| Meskens, L., Vandermersch, M. and Mathijs, E.                                                                                         | 2001 | Implication of the Introduction of Automatic Milking on Dairy Farm. Literature Review on the Determinants and implications of technology adoption                                    | Deliverable D1. FP5 EU project Implications of the introduction of automatic milking on dairy farms. |     |    |           | No work dimension        |
| Mosqueda, E. and Smith, R. and Goorahoo, D. and Shrestha, A.                                                                          | 2018 | Automated lettuce thinners reduce labor requirements and increase speed of thinning                                                                                                  | California Agriculture                                                                               | 72  | 2  | 114-119   | No robot                 |
| Mujeyi, A. and Mudhara, M. and Mutenje, M. J.                                                                                         |      | Adoption determinants of multiple climate smart agricultural technologies in Zimbabwe: Considerations for scaling-up and out                                                         | African Journal of Science Technology Innovation & Development                                       |     |    |           | No robot                 |
| Norton, T. and Chen, C. and Larsen, M. L. V. and Berckmans, D.                                                                        | 2019 | Review: Precision livestock farming: Building 'digital representations' to bring the animals closer to the farmer                                                                    | Animal                                                                                               | 13  | 12 | 3009-3017 | No robot                 |
| Ohnstad, I. and Riekerink, Rgmo and Hogewerf, P. and de Koning, Cajm and Barkema, H. W.                                               | 2012 | Short communication: Effect of automatic postmilking teat disinfection and cluster flushing on the milking work routine                                                              | Journal of Dairy Science                                                                             | 95  | 5  | 2567-2570 | No robot                 |
| Pagliacci, F. and Defrancesco, E. and Mozzato, D. and Bortolini, L. and Pezzuolo, A. and Pirotti, F. and Pisani, E. and Gatto, P.     | 2020 | Drivers of farmers' adoption and continuation of climate-smart agricultural practices. A study from northeastern Italy                                                               | Science of the Total Environment                                                                     | 710 |    |           | No robot                 |
| Pandey, S. K. and Jain, A. K. and Sharda, R. and Sharma, P. and Joshi, A.                                                             | 2018 | Economic Analysis of Automated Drip Irrigation System for Production of Tomato Crop                                                                                                  | Indian Journal of Economics and Development                                                          | 14  | 3  | 513-520   | No work dimension        |
| Park, J. E. and Nakamura, K.                                                                                                          | 2015 | Automatization, labor-saving and employment in a plant factory                                                                                                                       | Environmental Control in Biology                                                                     | 53  | 2  | 89-92     | No robot                 |

|                                                                                                     |      |                                                                                                                                                  |                                                                                    |     |   |           |                          |
|-----------------------------------------------------------------------------------------------------|------|--------------------------------------------------------------------------------------------------------------------------------------------------|------------------------------------------------------------------------------------|-----|---|-----------|--------------------------|
| Parsons, D. J.                                                                                      | 1988 | An initial economic assessment of fully automatic milking of dairy cows                                                                          | Journal of Agricultural Engineering Research                                       | 40  | 3 | 199-214   | No work dimension        |
| Paustian, M. and Theuvsen, L.                                                                       | 2017 | Adoption of precision agriculture technologies by German crop farmers                                                                            | Precision Agriculture                                                              | 18  | 5 | 701-716   | No robot                 |
| Pitkaranta, J. and Kurkela, V. and Huotari, V. and Posio, M. and Halbach, C. E.                     | 2019 | Designing Automated Milking Dairy Facilities to Maximize Labor Efficiency                                                                        | Veterinary Clinics of North America-Food Animal Practice                           | 35  | 1 | 175+      | No work dimension        |
| Posadas, B.                                                                                         | 2012 | Economic Impacts of Mechanization or Automation on Horticulture Production Firms Sales, Employment, and Workers' Earnings, Safety, and Retention | Horttechnology                                                                     | 22  | 3 | 388-401   | No robot                 |
| Posadas, B.                                                                                         | 2012 | Economic impacts of mechanization or automation on horticulture production firms sales, employment, and workers' earnings, safety, and retention | HortTechnology                                                                     |     |   |           | No robot                 |
| Posadas, B. C. and Knight, P. R. and Coker, R. Y. and Coker, C. H. and Langlois, S. A. and Fain, G. | 2008 | Socioeconomic impact of automation on horticulture production firms in the northern gulf of Mexico region                                        | Horttechnology                                                                     | 18  | 4 | 697-704   | No robot                 |
| Ren, G. and Lin, T. and Ying, Y. and Chowdhary, G. and Ting, K. C.                                  | 2020 | Agricultural robotics research applicable to poultry production: A review                                                                        | Computers and Electronics in Agriculture                                           | 169 |   |           | No work dimension        |
| Rijkaart, L. J. and Mollenhorst, H. and Hogeveen, H.                                                | 2011 | Alert preferences of dairy farmers working with automatic milking systems                                                                        | Udder Health and Communication                                                     |     |   | 391-398   | No work dimension        |
| Rodenburg, J.                                                                                       | 2002 | Robotic milkers: What, where...and how much!?!?                                                                                                  | Proc. Ohio Dairy Management Conf., Columbus, OH.                                   |     |   |           | No work dimension        |
| Rodenburg, J.                                                                                       | 2017 | Robotic milking: Technology, farm design, and effects on work flow                                                                               | Journal of Dairy Science                                                           | 100 | 9 | 7729-7738 | No work dimension        |
| Rodenburg, J.                                                                                       |      | Time for technology: Robotic milking has big labor saving benefits                                                                               | DairyLogix                                                                         |     |   |           | No eligibility           |
| Rossing, W. and Hogewerf, P. H.                                                                     | 1997 | State of the art of automatic milking systems                                                                                                    | Computers and Electronics in Agriculture                                           | 17  | 1 |           | No farm system or worker |
| Salovuuo, H. and Ronkainen, P. and Heino, A. and Suokannas, A. and Ryhänen, E. L.                   | 2005 | Introduction of automatic milking system in Finland: Effect on milk quality                                                                      | Agricultural and Food Science                                                      | 14  | 4 | 346-353   | No work dimension        |
| Sampoornam, K. P. and Dinesh, T. and Poornimasre, J.                                                | 2017 | Agriculture robot (Agribot) for harvesting underground plants (rhizomes)                                                                         | Agricultural Engineering International: CIGR Journal                               | 19  | 2 | 62-67     | No farm system or worker |
| Sannino, M. and Faugno, S. and Crimaldi, M. and Ardito, L. and Di Francia, A. and Masucci, F.       | 2017 | Automatic milking system occupation rate analysis and optimization applied to mediterranean buffaloes                                            | Chemical Engineering Transactions                                                  | 58  |   | 607-612   | No work dimension        |
| Seyyedhasani, H. and Peng, C. and Jang, W. J. and Vougioukas, S. G.                                 | 2020 | Collaboration of human pickers and crop-transporting robots during harvesting â€“ Part I: Model and simulator development                        | Computers and Electronics in Agriculture                                           | 172 |   |           | No work dimension        |
| Seyyedhasani, H. and Peng, C. and Jang, W. J. and Vougioukas, S. G.                                 | 2020 | Collaboration of human pickers and crop-transporting robots during harvesting â€“ Part II: Simulator evaluation and robot-scheduling case-study  | Computers and Electronics in Agriculture                                           | 172 |   |           | No work dimension        |
| Sonck, B. R.                                                                                        | 1995 | Labour research on automatic milking with a human-controlled cow traffic                                                                         | Netherlands Journal of Agricultural Science                                        | 43  | 3 | 261-285   | No work dimension        |
| Spahr, S. L. and Maltz, E.                                                                          | 1997 | Herd management for robot milking                                                                                                                | Computers and Electronics in Agriculture                                           | 17  | 1 | 53-62     | No work dimension        |
| Srivastava, A. C.                                                                                   | 1985 | Status of automation on farm                                                                                                                     | Journal of the Institution of Engineers (India): Agricultural Engineering Division | 66  |   | 21-25     | No work dimension        |
| Tamirat, T. W. and Pedersen, S. M. and Lind, K. M.                                                  | 2018 | Farm and operator characteristics affecting adoption of precision agriculture in Denmark and Germany                                             | Acta Agriculturae Scandinavica Section B-Soil and Plant Science                    | 68  | 4 | 349-357   | No robot                 |

|                                                                                                                                                                                                      |      |                                                                                                                                                       |                                                                                                                                                          |     |    |           |                          |
|------------------------------------------------------------------------------------------------------------------------------------------------------------------------------------------------------|------|-------------------------------------------------------------------------------------------------------------------------------------------------------|----------------------------------------------------------------------------------------------------------------------------------------------------------|-----|----|-----------|--------------------------|
| Tan Gar Heng, A. and Bin Mohamed, H. and Bin Mohamed Razaai, Z. F.                                                                                                                                   | 2020 | Implementation of lean manufacturing principles in a vertical farming system to reduce dependency on human labour                                     | International Journal of Advanced Trends in Computer Science and Engineering                                                                             | 9   | 1  | 512-520   | No robot                 |
| Toledo, O.M.; Steward, B.L.; Gai, J.; Tang, L.                                                                                                                                                       | 2014 | Techno-economic analysis of future precision field robots                                                                                             | In Proceedings of the American Society of Agricultural and Biological Engineers Annual International Meeting 2014, Montreal, QC, Canada, 13–15 July 2014 |     |    |           | No farm system or worker |
| Tsige, M. and SynnevÅyg, G. and Aune, J. B.                                                                                                                                                          | 2020 | Gendered constraints for adopting climate-smart agriculture amongst smallholder Ethiopian women farmers                                               | Scientific African                                                                                                                                       | 7   |    |           | No robot                 |
| van der Burg, S. and Bogaardt, M. J. and Wolfert, S.                                                                                                                                                 | 2019 | Ethics of smart farming: Current questions and directions for responsible innovation towards the future                                               | NJAS - Wageningen Journal of Life Sciences                                                                                                               | 90  |    |           | No robot                 |
| Vasconez, J. P. and Kantor, G. A. and Cheein, F. A. A.                                                                                                                                               | 2019 | Human-robot interaction in agriculture: A survey and current challenges                                                                               | Biosystems Engineering                                                                                                                                   | 179 |    | 35-48     | No farm system or worker |
| Vecchio, Y. and Agnusdei, G. P. and Miglietta, P. P. and Capitanio, F.                                                                                                                               | 2020 | Adoption of Precision Farming Tools: The Case of Italian Farmers                                                                                      | International Journal of Environmental Research and Public Health                                                                                        | 17  | 3  |           | No robot                 |
| Wagner-Storch, A. M., and R. W. Palmer.                                                                                                                                                              | 2003 | Feeding behavior, milking behavior, and milk yields of cows milked in a parlor versus and automatic milking system                                    | J. Dairy Sci.                                                                                                                                            |     |    |           | No work dimension        |
| Wang, X. and Yamauchi, F. and Huang, J.                                                                                                                                                              | 2016 | Rising wages, mechanization, and the substitution between capital and labor: Evidence from small scale farm system in China                           | Agricultural Economics (United Kingdom)                                                                                                                  | 47  | 3  | 309-317   | No robot                 |
| Was, A., Majewsky E., Cygansky, L. Bartolini, F., Floridi, M. and Viaggi, D.                                                                                                                         | 2011 | Assessment of Economic Effects of Innovation in Automatic Milking Systems in Podlaskie Region (Poland) with the Use of Real Option Approach           | Acta Scientiarum Polonorum Oeconomia 10(2)                                                                                                               |     |    |           | No farm system or worker |
| Wathes, C. M. and Kristensen, H. H. and Aerts, J. M. and Berckmans, D.                                                                                                                               | 2008 | Is precision livestock farming an engineer's daydream or nightmare, an animal's friend or foe, and a farmer's panacea or pitfall?                     | Computers and Electronics in Agriculture                                                                                                                 | 64  | 1  | 02-oct    | No robot                 |
| Wethal, K. B. and Svendsen, M. and Heringstad, B.                                                                                                                                                    | 2020 | Are farmer assessed temperament, milking speed, and leakage genetically the same traits in automatic milking systems and traditional milking systems? | Journal of Dairy Science                                                                                                                                 | 103 | 4  | 3325-3333 | No work dimension        |
| Adamides, G.                                                                                                                                                                                         | 2020 | A review of climate-smart agriculture applications in Cyprus                                                                                          | Atmosphere                                                                                                                                               |     |    |           | No farm system or worker |
| Silvi, R. and Pereira, L.G.R. and Paiva, C.A.V. and Tomich, T.R. and Teixeira, V.A. and Sacramento, J.P. and Ferreira, R.E.P. and Coelho, S.G. and Machado, F.S. and Campos, M.M. and DÃ³rea, J.R.R. | 2021 | Adoption of precision technologies by brazilian dairy farms: The farmer's perception                                                                  | Animals                                                                                                                                                  | 11  | 12 |           | No work dimension        |
| Yang, W and Edwards, JP and Eastwood, CR and Dela Rue, BT and Renwick, A and Yang, W. and Edwards, J. P. and Eastwood, C. R. and Dela Rue, B. T. and Renwick, A.                                     | 2021 | Analysis of adoption trends of in-parlor technologies over a 10-year period for labor saving and data capture on pasture-based dairy farms            | Journal of Dairy Science                                                                                                                                 | 104 | 1  | 431-442   | No robot                 |
| Wethal, K.B. and Svendsen, M. and Heringstad, B.                                                                                                                                                     | 2020 | Are farmer assessed temperament, milking speed, and leakage genetically the same traits in automatic milking systems and traditional milking systems? | Journal of Dairy Science                                                                                                                                 | 103 | 4  | 3325-3333 | No work dimension        |
| Haugen, S and Hallstrom, L and Grant, P and Cha, JE and MacQuarrie, P and Haugen, Stacey and Hallstrom, Lars and Grant, Payton and Cha, Justine and MacQuarrie, Patricia                             | 2021 | Assessing Automation in Rural Communities: An Economic Impact Assessment                                                                              | Journal of Rural and Community Development                                                                                                               | 16  | 2  | 275–297   | No robot                 |

*Supplementary material*

*Martin et al. 2022*

|                                                                                                                                                                                                                              |      |                                                                                                                                     |                                                                                   |     |              |                          |
|------------------------------------------------------------------------------------------------------------------------------------------------------------------------------------------------------------------------------|------|-------------------------------------------------------------------------------------------------------------------------------------|-----------------------------------------------------------------------------------|-----|--------------|--------------------------|
| Abhijeet, K. and Prasanna, S.B. and Mahesh, P.S. and Gouri, M.D. and Vivek, M.P. and Bhandekar, S.K. and Ali, S.M. and Masood, K.D. and Karan, P.                                                                            | 2021 | Comparative Study of Automation and Conventional System on Production Performance in Dairy Farms                                    | Asian Journal of Dairy and Food Research                                          | 40  | 25-29        | No paper access          |
| Kolenda, M. and Piwczyński, D. and Brzozowski, M. and Sitkowska, B. and Wójcik, P.                                                                                                                                           | 2021 | Comparison of yield, composition and quality of milk of Polish Holstein-Friesian cows in conventional and automatic milking systems | Annals of Animal Science                                                          | 21  | 2 709-720    | No work dimension        |
| King, M.T.M. and Matson, R.D. and DeVries, T.J.                                                                                                                                                                              | 2021 | Connecting farmer mental health with cow health and welfare on dairy farms using robotic milking systems                            | Animal Welfare                                                                    | 30  | 1 25-38      | No paper access          |
| Simoës, LM and Lopes, MA and Brito, SC and Rossi, G and Conti, L and Barbari, M and Simoes Filho, Luiz Marcos and Lopes, Marcos Aurelio and Brito, Sergio Correa and Rossi, Giuseppe and Conti, Leonardo and Barbari, Matteo | 2020 | Robotic milking of dairy cows: a review                                                                                             | Semino-Ciencias Agrarias                                                          | 41  | 6 2833-2850  | No work dimension        |
| Cisternas, I. and Velásquez, I. and Caro, A. and Rodríguez, A.                                                                                                                                                               | 2020 | Systematic literature review of implementations of precision agriculture                                                            | Computers and Electronics in Agriculture                                          | 176 |              | No work dimension        |
| Rose, D.C.; Wheeler, R.; Winter, M.; Lobley, M.; Chivers, C.-A.                                                                                                                                                              | 2021 | Agriculture 4.0: Making it work for people, production, and the planet.                                                             | Land Use Policy                                                                   | 100 |              | No robot                 |
| Sammons, P.J.; Furukawa, T.; Bulgin, A.                                                                                                                                                                                      | 2005 | Autonomous pesticide spraying robot for use in a greenhouse                                                                         | Proceedings                                                                       |     |              | No farm system or worker |
| Vasconez, J.P.; Kantor, G.A.; Auat Cheein, F.A.                                                                                                                                                                              | 2019 | Human–robot interaction in agriculture: A survey and current challenges                                                             | Biosystems Engineering                                                            | 179 | 35-48        | No work dimension        |
| Barkema, M.A.G. von Keyserlingk, J.P. Kastelic, T.J.G.M. Lam, C. Luby, J.P. Roy, S.J. LeBlanc, G.P. Keefe, D.F. Kelton                                                                                                       | 2015 | Invited review: Changes in the dairy industry affecting dairy cattle health and welfare                                             | Journal of Dairy Science                                                          | 98  | 11 7426-7445 | No farm system or worker |
| Dela Rue, B.T., Eastwood, C.R., Edwards, J.P., Cuthbert, S.,                                                                                                                                                                 | 2019 | New Zealand dairy farmer's preference investments in automation technology over decision-support technology                         | Animal Production Science                                                         | 60  | 1 133-137    | No robot                 |
| Treiber, Maximilian Hillerbrand, Franz Bauerdick, Josef Bernhardt, Heinz                                                                                                                                                     | 2019 | On the current state of agricultural robotics in crop farming chances and risks                                                     | 47th Symposium "Actual Tasks on Agricultural Engineering", Opatija, Croatia, 2019 | 47  | 27-33        | No farm system or worker |
| Rodenburg, J.,                                                                                                                                                                                                               | 2017 | Robotic milking: technology, farm design, and effects on work flow.                                                                 | Journal of Dairy Science                                                          | 100 | 9 7729-7738  | No farm system or worker |
| Wauters, E. & Mathijs, E                                                                                                                                                                                                     |      | Socio-economic consequences of automatic milking on dairy farms, Proceedings of the international symposium, Wageningen             |                                                                                   |     |              | No paper access          |
